1 **Title:**

2 **Tracking infectious entry routes of SARS-CoV-2**

3

4 **Authors:**

5 Alex J.B. Kreuzberger <sup>a,b</sup>, Anwesha Sanyal <sup>a,b</sup>, Anand Saminathan <sup>a,b</sup>, Louis-Marie Bloyet  
6 <sup>c</sup>, Spencer Stumpf <sup>c</sup>, Zhuoming Liu <sup>c</sup>, Ravi Ojha <sup>d</sup>, Markku T. Patjas <sup>e</sup>, Ahmed Geneid <sup>e</sup>,  
7 Gustavo Scanavachi <sup>a,b</sup>, Catherine A. Doyle <sup>f</sup>, Elliott Somerville <sup>b</sup>, Ricardo Bango Da  
8 Cunha Correira <sup>a,b</sup>, Giuseppe Di Caprio <sup>b,g</sup>, Sanna Toppila-Salmi <sup>h</sup>, Antti Mäkitie <sup>e</sup>, Volker  
9 Kiessling <sup>i</sup>, Olli Vapalahti <sup>d,j,k</sup>, , Sean P.J. Whelan <sup>c,\*</sup>, Giuseppe Balistreri <sup>d,j,l</sup>\*, and Tom  
10 Kirchhausen <sup>a,b,g,\*</sup>

11

12 **Affiliations:**

13 <sup>a</sup> Department of Cell Biology, Harvard Medical School, 200 Longwood Av, Boston, MA 02115,  
14 USA

15 <sup>b</sup> Program in Cellular and Molecular Medicine, Boston Children's Hospital, 200 Longwood Av,  
16 Boston, MA 02115, USA

17 <sup>c</sup> Department of Molecular Microbiology, Washington University in Saint Louis, 660  
18 South Euclid Avenue, Saint Louis, MI 63110, USA

19 <sup>d</sup> Department of Virology, Faculty of Medicine, University of Helsinki, Helsinki, Finland

20 <sup>e</sup> Department of Otorhinolaryngology and Phoniatics, Head and Neck Surgery, University of  
21 Helsinki and Helsinki University Hospital, Helsinki, Finland.

22 <sup>f</sup> Department of Pharmacology, University of Virginia, Charlottesville, VA 22903

23 <sup>g</sup> Department of Pediatrics, Harvard Medical School, 200 Longwood Ave, Boston, MA 02115, USA

24 <sup>h</sup> Department of Allergy, University of Helsinki and Helsinki University Hospital, Helsinki, Finland.

25 <sup>i</sup> Center for Membrane and Cell Physiology and Department of Molecular Physiology and  
26 Biological Physics, University of Virginia, Charlottesville, VA 22903

27 <sup>j</sup> Department of Veterinary Biosciences, University of Helsinki, Helsinki, Finland

28 <sup>k</sup> Virology and Immunology, Helsinki University Hospital Diagnostic Center (HUSLAB), Helsinki,  
29 Finland

30 <sup>l</sup> The Queensland Brain Institute, University of Queensland, Brisbane, Australia

31

32 \* Corresponding authors.

33 [kirchhausen@crystal.harvard.edu](mailto:kirchhausen@crystal.harvard.edu) (T.K.)

34 [giuseppe.balistreri.fi](mailto:giuseppe.balistreri.fi) (G.B.)

35 [spjwhelan@wustl.edu](mailto:spjwhelan@wustl.edu) (S.P.J.W.)

36

37 **One sentence summary:**

38 Detailed molecular snapshots of the productive infectious entry pathway of SARS-CoV-2 into cells

39 **ABSTRACT:**

40 **SARS-CoV-2 cell entry starts with membrane attachment and ends with spike-protein (S)**  
41 **catalyzed membrane fusion depending on two cleavage steps, one usually by furin in**  
42 **producing cells and the second by TMPRSS2 on target cells. Endosomal cathepsins can**  
43 **carry out both. Using real-time 3D single virion tracking, we show fusion and genome**  
44 **penetration requires virion exposure to an acidic milieu of pH 6.2-6.8, even when furin and**  
45 **TMPRSS2 cleavages have occurred. We detect the sequential steps of S1-fragment**  
46 **dissociation, fusion, and content release from the cell surface in TMPRSS2 overexpressing**  
47 **cells only when exposed to acidic pH. We define a key role of an acidic environment for**  
48 **successful infection, found in endosomal compartments and at the surface of TMPRSS2**  
49 **expressing cells in the acidic milieu of the nasal cavity.**

50

51 **Significance Statement:**

52 Infection by SARS-CoV-2 depends upon the S large spike protein decorating the virions and is  
53 responsible for receptor engagement and subsequent fusion of viral and cellular membranes  
54 allowing release of virion contents into the cell. Using new single particle imaging tools, to  
55 visualize and track the successive steps from virion attachment to fusion, combined with  
56 chemical and genetic perturbations of the cells, we provide the first direct evidence for the  
57 cellular uptake routes of productive infection in multiple cell types and their dependence on  
58 proteolysis of S by cell surface or endosomal proteases. We show that fusion and content  
59 release always require the acidic environment from endosomes, preceded by liberation of the  
60 S1 fragment which depends on ACE2 receptor engagement.

61 **Main Text:**

62 SARS-CoV-2 cell entry begins with engagement at the cell-surface and ends with deposition of  
63 the viral contents into the cytosol by membrane fusion. The first step is binding of the viral spike  
64 protein (S) with its cellular receptor, angiotensin converting enzyme (ACE2) (1–4). The last step  
65 delivers the viral genomic RNA in association with the nucleocapsid protein (N), which is removed  
66 for translation of the input genome (5, 6). Proteolytic activation of S by additional host-cell factors  
67 is necessary for it to function as a fusogen. Cleavage of S by furin in producer cells (7) generates  
68 the S1 receptor binding subunit non-covalently associated with the S2 fusion subunit. The S  
69 protein is cleaved by cell surface or endosomal proteases during virion entry into host cells, that  
70 activate the viral fusion machinery (1, 8–10). This entry associated proteolysis of S has led to the  
71 current model of two routes of infectious cell entry: fusion of viral and cellular membranes at the  
72 host-cell surface or fusion following endosomal uptake (6).

73

74 The cellular proteases that are involved in processing S during entry include the transmembrane  
75 serine proteases TMPRSS2 or TMPRSS4 found at the cell surface (1, 8), and the endosomal  
76 cathepsins that require the acidic milieu of the compartments in which they are enriched (1, 10).  
77 Processing of S by TMPRSS proteases or by cathepsins, at a site designated S2', depends on  
78 prior cleavage at the furin site in the producer cells (7, 11, 12). TMPRSS cleavage has been  
79 thought to result in infection from the plasma membrane and cathepsin cleavage, in cells lacking  
80 TMPRSS activity, with infection from endosomes (5, 6). Chemical inhibitors of TMPRSS or  
81 cathepsin proteases in cells in culture indeed show that infection of some cell types is more  
82 sensitive to inhibition of endosomal cathepsins whereas others are more sensitive to inhibition of  
83 TMPRSS proteases (1, 9). TMPRSS inhibitors such as camostat and nafamostat are in clinical  
84 development as SARS-CoV-2 therapeutics, further highlighting the need to understand how entry  
85 pathways depend upon specific proteases.

86

87 To analyze the routes of cellular uptake that lead to successful fusion and release of virion  
88 contents into the cytoplasm, we developed a set of new tools that allow direct visual tracking of  
89 the uptake of single virions and release of their contents. Using a chimeric vesicular stomatitis  
90 virus (VSV) in which SARS-CoV-2 S has replaced the endogenous glycoprotein gene (G), we  
91 modified the virus to permit the separate tracking of the S protein and the viral contents. We  
92 engineered a structural component of the replicative core of VSV, the phosphoprotein (P), to  
93 append to its amino terminus enhanced green fluorescent protein (eGFP), for tracking the virion  
94 content. This eGFP-P chimeric virus is structurally fluorescent and depends upon S for entry. We

95 also sparsely labelled the S protein by direct conjugation with a fluorescent dye, allowing us to  
96 visualize the steps of entry, from S1 fragment release to membrane fusion, including virion content  
97 release into cells during productive infection. We have found that content release requires acidic  
98 pH and that it occurs principally from endosomes irrespective of the cell type and irrespective of  
99 the dependence of the virus on TMPRSS2 or cathepsin-mediated processing of S. Only mild  
100 acidification of the medium allows efficient entry at the plasma membrane. We correlate our  
101 findings with studies of infection by several human isolates of SARS-CoV-2.

102

## 103 **RESULTS**

### 104 **Cell entry of individual virions mediated by SARS-CoV-2 S**

105 We used live-cell fluorescence microscopy to monitor uptake of single VSV-SARS-CoV-2 virions  
106 that depend upon SARS-CoV-2 S for infection (Wuhan Hu-1 isolate and Delta and Omicron  
107 variants, chimeras generated as described: see Methods and (13)) and for the Wuhan variant  
108 also containing a fluorescent internal structural protein, P, fused at its amino terminus to eGFP  
109 (eGFP-P) (Fig. S1). We counted the number of tagged particles internalized 1 hr post inoculation  
110 at MOI 0.5 and found 50-70 particles in Caco-2, Calu-3, and Vero cells, but about three times that  
111 number in Vero-TMPRSS2 cells, which overexpress TMPRSS2 (Fig. S1D, E), presumably  
112 because of more efficient TMPRSS2 cleavage in the high expression cell line. Examination of the  
113 labeled virions by spinning-disc confocal microscopy showed distinct, diffraction-limited puncta  
114 with a single, Gaussian distribution of fluorescent intensities (Fig. S2A), consistent with the  
115 presence of single virus particles and absence of virion aggregates. We also labeled the S protein  
116 sparsely with the fluorescent dye Atto565 NHS ester (25-35 dyes per virion), with minimal effect  
117 on particle infectivity (Fig. S2A-D). The double labeling allowed us to track the viral S protein  
118 separately from the virion contents.

119

### 120 **SARS-CoV-2 S-mediated entry requires endocytic uptake**

121 We used live-cell volumetric, lattice-light-sheet fluorescence microscopy (LLSM) (14) to obtain 3D  
122 views of virion cell-entry over time during their uptake into cells (Figs. 1A-E, Fig S3). We incubated  
123 cells for 8 min, transferred them to the LLSM, and recorded sequential 3-D stacks from a single  
124 cell, acquiring a full stack every 2 sec, for 10 min (300 stacks total). We then moved quickly to  
125 an adjacent cell and recorded a similar 10 min series of 300 stacks, after which we moved finally  
126 to a third neighboring cell, for 10 min. The sequence of representative 10-plane projections in  
127 Fig. 1B shows that particles attached to the cell surface during the initial 8 min incubation, followed  
128 by efficient internalization at later time points. The figure shows images from Vero-TMPRSS2

129 cells; we obtained similar results for Vero, Caco-2 and Calu-3 cells, as shown in Fig S3. The views  
130 from 20- and 30-minutes post-inoculation also showed many examples of intracellular spots  
131 labeled with eGFP-P only, representing delivery of the VSV ribonucleoprotein core (RNP) into  
132 cells visualized as the separation of fluorescent eGFP-P from the membrane-bound, Atto565  
133 labelled S glycoprotein.

134

135 We confirmed that the views in Fig 1B reflected the outcome of sequential internalization and  
136 RNP delivery events by tracking individual particles in the volumetric time series acquired using  
137 LLSM (Fig. 1C). Single virions attached to cells during the 8 min period following addition of virus,  
138 and ~ 90% (1508/1692) of the attached particles had internalized during the 30 min time course,  
139 as recorded in 60 time-lapse 3D videos from 20 cells. The representative 10-plane projection in  
140 Fig. 1C obtained during the initial 10-minute interval shows several single-particle examples of  
141 virion internalization and three events of RNP core release (for similar results with Vero, Caco-2  
142 and Calu-3 cells, see Fig S3). The highlighted example in Fig. 1C and the complete ortho  
143 projection in Fig. 1D show a fluorescent spot corresponding to a virus particle, first captured at  
144 the cell surface, then undergoing rapid directed movement towards the cell interior, due to  
145 endocytosis and intracellular traffic of virus-containing vesicles. Dissociation of the eGFP-P from  
146 the Atto565 signals marks delivery of the genome into the cytosol (see also Figs. S3-S7). In a  
147 total of 60 Caco-2, Calu-3, Vero and Vero-TMPRSS2 cells, we detected separation of signals at  
148 an intracellular location for 138/1692 trajectories during the 30-min interval starting two minutes  
149 after an initial 8-minute inoculation (Fig. 1E), and only one dissociation event at the cell surface  
150 (for a Vero-TMPRSS2 cell). The fluorescent signals from eGFP-P released in these times frames  
151 remained stable and punctate in the cytosol during the duration of the 10 min acquisition, and any  
152 released eGFP-P in the cytosol at the outset of the second or third 10 min time series remained  
153 stable for the entire 10 min recording. Moreover, we never observed uncoated (delivered)  
154 particles (i.e., released eGFP-P) in the early frames of the time lapse from the first cell. These  
155 observations rule out the possibility of rapid, early entry events from the cell surface or from  
156 endosomes during the "blind" 8 minutes during inoculation, and we conclude that an endocytic  
157 route accounted for all but one of the detected VSV-SARS-CoV-2 fusion events in these  
158 experiments.

159

160 Analysis of mean square displacement (MSD) curves from three-dimensional, single-particle  
161 trajectories allowed us to determine the dynamic regime of the particle at any time point after  
162 attachment. The alpha coefficient ( $\alpha$ ) in the anomalous diffusion equation ( $\langle r^2 \rangle = 6Dt^\alpha$ )

163 corresponds to confined motion ( $\alpha < 0.8$ ) for the virus attached to the cell surface, directed motion  
164 ( $\alpha > 1.2$ ) for intracellular particles with co-localized Atto565-labelled S and eGFP-P labelled RNP,  
165 presumably associated with endosomes, and Brownian motion ( $0.8 < \alpha < 1.2$ ) for eGFP-P spots  
166 diffusing in the cytosol. The results shown in Fig. 1F (which corresponds to the viral particle traced  
167 in Figs. 1 C and D) and the summary for all tracked particles in Fig. 1G (see also Fig. S3-S7)  
168 illustrate the moment at which an RNP escapes into the cytosol ( $\alpha = 1.07$ ), while the tagged S  
169 remains associated with an endosome ( $\alpha = 1.93$ , see below).

170  
171 The chimeric VSV particles are roughly 80 by 200 nm (15, 16) and appear in the microscope as  
172 diffraction-limited spots. Endosomes typically range in diameter from 300-1000 nm (17). Thus, a  
173 subset of fluorescent endosomes are larger than the diffraction limit, facilitating use of an  
174 increased apparent size of an Atto565 fluorescent spot as a proxy for viral membrane fusion with  
175 the surrounding (larger) endosomal membrane (Fig. S8). Using this approach, we detected fusion  
176 in  $17 \pm 4\%$  ( $n = 20$  virions),  $28 \pm 2\%$  ( $n = 61$  virions),  $23 \pm 2\%$  ( $n = 27$  virions), and  $27 \pm 6\%$  ( $n =$   
177  $30$  virions) of the traces in Vero, Vero-TMPRSS2, Caco-2 or Calu-3 cells, respectively. All the  
178 events coincided with release into the cytosol of the eGFP-P labeled RNP core of VSV (Figs. 1E,  
179 S3, S7). We did not observe release of the virion contents at the plasma membrane (Figs. 1E,  
180 S3-S7), indicating that S-mediated infection of cells only occurred through an endocytic pathway.

181

## 182 **SARS-CoV-2 S-mediated infection requires endocytosis**

183 Dynamin, a large GTPase required for cargo uptake in clathrin-mediated or fast endophilin-  
184 mediated endocytosis (18), is susceptible to interference by a dominant negative mutant, K44A  
185 (19). To test whether dynamin-dependent endocytosis is necessary for SARS-CoV-2 S mediated  
186 infection, we transiently over expressed the dominant-negative mutant in Caco-2, Calu-3, Vero  
187 and Vero-TMPRSS2 cells. We monitored the effect on infection of these cells by VSV-SARS-  
188 CoV-2 that expresses eGFP as a marker of infection (VSV-eGFP-SARS-CoV-2) according to the  
189 scheme summarized in Fig S9A, and we quantified infection by single-cell imaging at 8 hours post  
190 inoculation. In control cells, to achieve comparable infectivity we used 10 times more VSV-SARS-  
191 CoV-2 for Caco-2 and Calu-3 cells than for Vero or Vero-TMPRSS2 over-expressing TPMRSS2  
192 (Figs. S9B, C). Irrespective of the cell type, infection was inhibited by the dominant negative  
193 dynamin mutant (Fig 1H) or by addition of dynasore-OH, a small molecule dynamin inhibitor (20)  
194 (Fig. 1I). Dynasore-OH addition at 1h post-inoculation had no effect on viral infectivity, consistent  
195 with inhibition of an early, entry-related event, but not with later inhibition of viral gene expression  
196 (Fig. S9C). We previously reported that S mediated infection of cells by VSV-SARS-CoV-2

197 correlates well with infection by SARS-CoV-2 (9, 13, 21, 22). In accord with that correlation,  
198 dynasore-OH also inhibited infection of Calu-3 and Vero-TMPRSS2 cells by a SARS-CoV-2  
199 Wuhan (B.1) clinical isolate (Fig 1J). These results show a critical role for endocytosis in SARS-  
200 CoV-2 infection of multiple cell types in culture including cells that express TMPRSS2.

201

### 202 **Viral entry from endosomes**

203 Our data show that internalized virus particles reached internal membrane compartment(s) from  
204 which fusion and genome entry into the cytosol occurred. To establish the identity of the(se)  
205 endosomal compartments, we used live-cell LLSM to track particles entering SVG-A cells  
206 ectopically expressing ACE2, or both ACE2 and TMPRSS2, and gene-edited for fluorescent  
207 labeling of specific endosomal compartments. (Fig. 2A, S10). Single particle tracking of 6815  
208 viruses over a 50 min period starting from 30 minutes post inoculation of cells revealed VSV-  
209 SARS-CoV-2 particles trafficked from the cell surface to early endosomes marked with early  
210 endosomal antigen 1 fused to the fluorescent protein Scarlett (EEA1-mScarlett) and subsequently  
211 to late endosomes/lysosomes marked with a Halo-tagged version of the cholesterol transporter  
212 Niemann Pick C1 NPC1-Halo-JFX646 (examples for single virions shown in Fig 2 B, C, S11-S12).  
213 We only detected particles located in the interior localizing with the endosomal markers in early  
214 frames of the time lapse from the first cell taken at the end of the 30 min inoculation period. Like  
215 with the other cells, these observations also rule out for SVG-A cells the possibility of entry events  
216 from the cell surface or from endosomes during the 30-min inoculation period.

217

218 To establish the location of the compartments from which the virion contents were released, we  
219 identified the point at which the trajectory of the eGFP-P signal changed from directed ( $\alpha > 1.2$ ) to  
220 Brownian ( $0.8 < \alpha < 1.2$ ) concomitant with a loss of co-localization with endosomal markers  
221 (examples for single virions shown in Fig 2 D, E, S13-S14). All entry events occurred from  
222 compartments marked with either EEA1 or NPC1 in cells expressing TMPRSS2, and only from  
223 NPC1-compartments in cells lacking TMPRSS2 (Fig. 2 F, S15).

224

### 225 **Release of S1 at the surface of cells expressing TMPRSS2**

226 Membrane fusion mediated by S depends on its proteolytic cleavage and dissociation of the S1  
227 fragment (6). Cleavage alone does not release S; the required trigger is ACE2 binding. Addition  
228 of soluble ACE2 ectodomain to VSV-SARS-CoV-2 particles activated by trypsin, to bypass  
229 TMPRSS2, released about 70% of the Atto 565 label, a reasonable estimate of the fraction of S1  
230 rather than S2. In live-cell imaging experiments with TMPRSS2 expressing cells, we noted a



231 partial loss of Atto 565 intensity from labeled VSV-SARS-CoV-2 particles after they attached to  
232 the cell surface (Fig. S19). In these experiments, we used a microfluidics device to introduce virus  
233 to cells while in the LLSM, enabling us to detect attachment directly. We interpreted the loss of  
234 Atto 565 signal as S1 dissociation, and we took it as a proxy for cleavage by TMPRSS2 at the S2'  
235 site on an ACE2-attached spike protein. Dissociated S1 will remain attached to ACE2 for some  
236 time, and in about ~2 % of the events, we could indeed detect lateral spreading (interpreted as  
237 diffusion in the plasma membrane) associated with the abrupt partial reduction of the punctate  
238 Atto 565 signal. We found ~25% loss of the Atto 565 signal per particle in ~ 78% of particles at  
239 the surface of Vero-TMPRSS2 cells expressing TMPRSS2 (Fig. 3 A-D) within the first 10 min of  
240 LLSM single-particle tracking (Fig. 1E). In all cases the loss was in a single step with a half time  
241 of 2 sec or less (Fig. 3B and Fig. S16). The signal reduction, which preceded endocytosis, was  
242 never associated with RNP delivery (e.g., eGFP-P) from the cell surface (Fig. 1E, cell #1), except  
243 under the special circumstances of slightly acidic medium during inoculation as described in the  
244 following section (Fig. 3 E-J and Fig. 4). The signal loss at the cell surface depended strictly on  
245 TMPRSS2 activity, as it was inhibited by 10  $\mu$ M Camostat and was absent in Vero cells lacking  
246 TMPRSS2 (Fig 3D). The decrease in punctate intensity, which we interpret as release of S1,  
247 occurred in less than 5% of particles attached to Caco-2 or Calu-3 cells, which naturally express  
248 TMPRSS2 (Fig. 3D). This result suggests that in these cells, cleavage at S2' by TMPRSS2 occurs  
249 primarily after uptake into endosomes.

250

### 251 **Viral membrane fusion requires acidic pH**

252 Endosomes undergo rapid acidification, and acidic pH is a trigger that induces fusogenic  
253 conformational changes in many viral envelope proteins. We therefore examined the effect of pH  
254 on productive viral entry by adjusting the pH of the medium at 10 minutes post inoculation. From  
255 187 traces from VERO-TMPRSS2 cells incubated at pH 6.8, we observed 84 fusion events at the  
256 cell surface, as defined by loss of Atto 565 signal and by accompanying eGFP-P delivery into the  
257 cytosol (Fig. 3 E-H, S17). The abrupt partial loss of punctate signal, interpreted as S1-fragment  
258 release, always preceded fusion (signaled by diffusion in the plasma membrane of the remaining  
259 Atto 565 signal with a half-life of about 20 sec) and by eGFP-P delivery into the cytosol, typically  
260 within 10 sec (Fig. 3 E, F). We defined eGFP-P delivery into the cytosol by a change in its motion  
261 from confined ( $\alpha < 0.8$ ) when on the cell surface to Brownian ( $0.8 < \alpha < 1.2$ ) when in the cytosol  
262 (Fig. 3G). In the absence of S1-release, we did not detect S1 diffusion or eGFP-P delivery into  
263 the cytosol. We conclude that release of S1 and subsequent or concomitant exposure to acidic  
264 pH result in release of virion contents into the cell.

265

266 Incubation of Vero-TMPRSS2 cells at pH 6.2 rather than 6.8 during inoculation prevented release  
267 of the S1-fragment and hence prevented viral fusion at the cell surface (Fig. 3 E, G, and H). This  
268 pH dependence is consistent with an expected loss of TMPRSS2 proteolytic activity as the pH  
269 falls below 7. When cells were incubated at pH 7.4 throughout infection, we did not observe any  
270 particle fusion and content release at the cell surface, even though TMPRSS2 cleavage, as  
271 detected by S1-fragment release, still occurred (Fig. 3 E, G and H).

272

273 The efficiency of entry by VSV-SARS-CoV-2 tracked by visualizing content release or by extent  
274 of infection increased in Vero-TMPRSS2 cells at pH 6.8 (Fig. 3H). To investigate further the  
275 requirement of acidic pH for efficient SARS-CoV-2 S-mediated membrane fusion, we carried out  
276 bypass experiments to initiate infection directly at the cell surface. We blocked endocytic uptake  
277 into cells with dynasore-OH and exposed bound particles to different pH ranging from 6.2-7.4.  
278 Infection of Vero, Caco-2 or Calu-3 cells was blocked regardless of the pH, whereas Vero cells  
279 overexpressing TMPRSS2 were readily infected by acid triggering of the S protein at the cell  
280 surface (Fig. 3J, S18).

281

282 These results were consistent with the observed lack of release of the S1-fragment from viruses  
283 at the surface of Vero, Caco-2, or Calu-3 cells (Fig. 3D). To eliminate a requirement for TMPRSS2  
284 cleavage of S, we pre-activated particles by incubation with trypsin before inoculating the cells.  
285 These pre-activated particles were as infectious in Vero-E6 TM cells treated with dynasore-OH  
286 and inoculated at pH < 7 as non-trypsinized particles in the same cells and conditions. Thus,  
287 trypsin and TMPRSS2 cleavages were equally effective in activating the particles. With  
288 progressive acidification of the medium, infection increased, reaching a maximum at pH 6.6 and  
289 remaining constant to pH 6.2 (Fig. 3H). These results show that S-mediated fusion requires pH <  
290 7. We obtained similar results concerning the effect of pH on infectivity of authentic SARS-CoV-  
291 2 with cells in which endocytosis was blocked and genome penetration depended solely on cell-  
292 surface fusion events (Fig 3I-J).

293

#### 294 **Influence of S protein variation on infectious entry pathways**

295 We found that response to infection inhibitors and the requirement for endocytosis and proteolytic  
296 cleavage of S for the VSV chimera with the Delta variant S protein were essentially the same for  
297 the chimera with the S protein from the original Wuhan-Hu1 isolate (Fig. 4A-D and S20, S21).  
298 Conserved events included release of the S1-fragment from receptor-bound virions attached to

299 Vero-TMPRSS2 cells (Fig. 4 B), and S1 release followed by fusion and genome penetration when  
300 inoculation was at pH 6.5-6.8 (Fig. 4C). Both Wuhan-Hu1 and Delta also showed enhanced  
301 infectivity of Vero-TMPRSS2 cells inoculated at pH 6.8 (Fig. E-G).

302

303 Examination of the entry pathway mediated by the S protein of Omicron varied with the cell type  
304 used to produce the virus. VSV-Omicron produced in Vero-TMPRSS2 cells depended on  
305 TMPRSS2 activation for infection of Vero-TMPRSS2, although somewhat fewer virions released  
306 the S1 fragment at the cell surface (Fig 4B-D). VSV-SARS-CoV-2 chimeras with Omicron S  
307 produced in MA104 cells could not be activated by TMPRSS2 and failed to infect or fuse from the  
308 surface of Vero-TMPRSS2 cells at pH 6.8 (Fig. 4A-D, S20, S21). Infection required activation by  
309 cathepsins for fusion and infection from endosomes (Fig 4 A-D, S20, S21). Trypsin treatment of  
310 VSV-SARS-CoV-2-Omicron, which cleaves at both the furin and TMPRSS protease sites (23),  
311 allowed infection to proceed from the cell surface at acidic pH, independent of the producer cell  
312 line, even in the presence of an endocytosis inhibitor (Fig.4A-D, S20, S21).

313

314 Sequence analysis of the genomic RNA from the VSV-SARS-CoV-2 chimeric viruses confirmed  
315 the presence of the TMPRSS2 and furin cleavage sites in Omicron S. As furin cleavage in  
316 producing cells is essential for subsequent proteolysis by TMPRSS2 in the infecting cell, we  
317 tested whether incomplete furin cleavage explained the differential susceptibility to TMPRSS2  
318 activation. We found much less cleavage of Omicron S for virus produced in MA104 cells (Fig 4D)  
319 than for virus produced in Vero-TMPRSS2 cells (Fig. 4D). Particles with furin cleaved S were  
320 susceptible to TMPRSS2 activation (Fig 4A-D), released the S1-fragment (Fig 4A), and fused at  
321 pH 6.8 (Fig. 4 B,D).

322

### 323 **Intranasal pH**

324 Our results suggest that an acidic environment is required for successful infection, found in  
325 endosomal compartments and at the surface of TMPRSS2 expressing cells purposely exposed  
326 to mildly acidic extracellular pH conditions. Since expression of TMPRSS2 appears to be highly  
327 expressed in a subset of cells located in the nasopharyngeal cavity (24, 25), we asked whether  
328 this milieu would be acidic. Using a pH catheter placed in the left and right nasal cavities of 17  
329 healthy male and female volunteers, we found a mildly acidic pH of around 6.6 (Fig. 4 E), in  
330 agreement with earlier measurements (26, 27).

## 331 **DISCUSSION**

332 We examined how SARS-CoV-2 Wuhan and its variants Delta and Omicron enter host cells using  
333 a combination of high-resolution live cell 3D imaging and quantitative assays for viral infectivity.  
334 Real-time tracking of single VSV-SARS-CoV-2 chimeric particles by lattice light sheet microscopy  
335 allowed us to visualize directly, with a sensitivity and time resolution substantially greater than  
336 any previous work, the key early steps of viral infection: virion binding, release of the S1-fragment  
337 upon cleavage by TMPRSS2, viral membrane fusion, and genome penetration into the cytosol.  
338 These observations revealed a previously unsuspected requirement to fuse by exposure to pH  
339 between 6.5 to 6.8, even after priming by TMPRSS2 and the attendant release of S1 and the S2'  
340 fragment (Figure 5).

341  
342 Current understanding, derived in part from earlier work on SARS-CoV, has assumed that the  
343 only requirement for low pH was for cathepsin L activity when TMPRSS2 was absent or furin  
344 cleavage, a prerequisite for TMPRSS2 digestion, had failed during exit from the producing cell (1,  
345 11, 12, 28–30). Our results instead distinguish three complementary routes of productive entry,  
346 all of which involve exposure of the entering particle to pH < 6.8. The two principal routes are by  
347 uptake and traffic to early endosomes, for TMPRSS2-primed virions, or to late endosomal  
348 compartments, for cathepsin cleavage in cells regardless of the presence or absence of  
349 TMPRSS2. A third, minor route does not require virion uptake, but instead proceeds entirely at  
350 the cell surface, but only if cell attachment is at a pH range between 6.5 and 6.8. These  
351 observations define the alternative, multi-step pathways of SARS-CoV-2 entry and restrict the  
352 conditions for cell-surface penetration.

353  
354 The released Atto 565-labeled fragment diffused laterally in the membrane, away from the labeled  
355 virion, consistent with our identification of the fragment as S1, which we expect to remain attached  
356 to ACE2. The release, which always preceded membrane fusion, was independent of exposure  
357 to acidic pH. Its dissociation was necessary but not sufficient for S2 to undergo its full, fusion-  
358 promoting conformational change. Release required S2' site cleavage, as evidenced by its  
359 absence in the presence of the TMPRSS2 inhibitor, Camostat, and by its absence, even in  
360 TMPRSS2 expressing cells, at pH lower than about 6.5, where TMPRSS2 is inactive. Trypsin  
361 cleavage in our experiments circumvented TMPRSS2 activity, and we indeed observed fusion at  
362 pH as low as 6.2.

363

364 The structure of the spike protein and the distribution of lysine residues suggest that most of the  
365 Atto 565 label will be on S1 and hence, from the fraction of total label released, that about 25%  
366 of the S-protein trimers will have shed S1 upon interaction with membrane bound ACE2,  
367 assuming that dissociation of the 3 S1 fragments is cooperative. We estimate from the ratios of  
368 stained band intensities on SDS-PAGE that the VSV chimeras have 15-20 S trimers on their  
369 surface, and we infer from these numbers that on average, 3-4 spike will have lost S1, liberating  
370 their S2 fragments to extend and interact with the host-cell membrane. This estimate is consistent  
371 with the likely fraction of the virion surface that makes contact with the cell membrane and with  
372 the dependence of S1 shedding from a trimer on its binding to ACE2. It is also consistent with the  
373 number of active fusion proteins on other viruses, including VSV itself, required for fusion to  
374 proceed (31–34).

375  
376 Syncytium formation between cells expressing SARS-CoV-2 spike and cells expressing ACE2,  
377 often used as a spike-mediated fusion assay, does not appear to depend upon acidic pH. But  
378 the interface between the two cells will have vastly more spike protein than the interface between  
379 a virus and a target cell. Thus, even low probability S1 dissociation events should be sufficient to  
380 create a fusion pore, which can widen and spread across the entire cell-cell junction.

381  
382 Release of S1 from a spike also detaches that spike from ACE2. Because cleavage at the S2'  
383 site was complete in our experiments, any spike bound by ACE2 would probably have released  
384 S1. Continued association with the host cell would thus have depended on formation of  
385 alternative contacts as S1 dissociates. We propose that formation of an extended intermediate  
386 and insertion of the S2 fusion peptides into the host-cell membrane creates the interactions that  
387 retain the virion at the cell surface. This proposal further implies that protonation of one or more  
388 S2 residues at acidic pH then enables S2 to collapse toward the folded-back, post fusion trimer  
389 of hairpins and pull together the viral and host-cell lipid bilayers.

390  
391 The Omicron variant is more refractory to furin cleavage than previously isolated strains. Its entry  
392 pathway will thus depend on the level of furin activity in the producing cells. We indeed found  
393 that when grown in Vero-TMPRSS2 cells, Omicron VSV chimeras were susceptible to S2'  
394 cleavage by TMPRSS2 and entered from early endosomes or at the cell surface at mildly acidic  
395 pH, but when grown in MA104 cells, they required cathepsin cleavage in late endosomes for  
396 entry. With authentic SARS-CoV-2 virus, TMPRSS2 susceptibility similarly depended on the cells

397 in which the virus was propagated. These observations resolve some ambiguities in the literature  
398 concerning the role of TMPRSS2 in Omicron infection (35–37).

399

400 Together with differential protease activities, the pH of respiratory mucosa could also influence  
401 viral tropism. The pH of the airway-facing surface of the nasal cavity is between 6.2 and 6.8 (our  
402 observations and (26). Thus, in principle, rapid entry could occur at the surface of TMPRSS2-  
403 expressing cells in the nose. In other parts of the nasopharyngeal cavity and in the lung, the pH  
404 is neutral (38), and we would not expect virus to fuse in those tissues until its endocytic uptake.

405

406 Our suggestion that at neutral pH, a relatively long-lived, extended S2 intermediate may be  
407 present at the virus-cell interface bears both on potential therapeutic interventions and on the  
408 availability of otherwise occluded epitopes to mucosal antibodies. Persistence of an extended  
409 intermediate after gp120 release during HIV entry is thought to account for inhibition of viral  
410 infectivity by the peptide fusion inhibitor enfuvirtide and for neutralization by antibodies that  
411 recognize epitopes unavailable on a prefusion Env trimer. Our results are consistent with  
412 observations that comparable interventions can impede SARS-CoV-2 infection in animal models  
413 (39).

## 414 **MATERIAL AND METHODS**

### 415 **Materials and Cells**

416 All materials and cells used in this study are described in detail in Supplementary Appendix S1.

417

### 418 **Generation of VSV-SARS-CoV-2 chimeras**

419 The generation of a replication competent recombinant VSV chimera expressing eGFP where the  
420 glycoprotein G was replaced with spike (S) protein Wuhan-Hu-1 strain (VSV-eGFP-SARS-CoV-  
421 2) has been described (13). Additional details for the generation of the VSV recombinants  
422 expressing eGFP and SARS-CoV-2 spike variants for Delta (B.1.617.2) and Omicron (B.1.1.529)  
423 are described in Supplementary Appendix S1.

424

### 425 **Generation of SVG-A cells expressing ACE2 and TMPRSS2**

426 SVG-A cells ectopically expressing ACE2 and TMPRSS2 were generated by lentivirus  
427 transduction. Briefly, lentivirus encoding human ACE2 or TMPRSS2 were generated as follows:  
428 HEK293T packaging cells were seeded at  $3.8 \times 10^6$  cells in a 10 cm tissue culture plate and grown  
429 in complete DMEM supplemented with 10% v/v FBS at 37 °C and 5% CO<sub>2</sub>.

430

431 Transfection mixtures containing 90 µL lipofectamine 3000 (Thermo Scientific L3000001),  
432 psPAX2 (1.3 pmol; Addgene #12260), pMD2.G (0.72 pmol; Addgene #12259) and  
433 TMPRSS2/pLX304 or ACE2/pLJM1 (1.64 pmol; gifts from Sean Whelan) 90 µL lipofectamine  
434 3000 (Thermo Scientific L3000001), 1ul psPAX2 (1.3 pmol; Addgene #12260), 0.6 ul pMD2.G  
435 (0.72 pmol; Addgene #12259) and 1.2 ul TMPRSS2/pLX304 or ACE2/pLJM1 (1.64 pmol) in 5 ml  
436 OptiMEM medium (Thermo Scientific 31985062) mixed by pipetting and incubated for 20 minutes  
437 at room temperature. 0.7 million cells were plated in a 10 cm plate 18 hr prior to transfection; the  
438 medium was then replaced with the entire transfection mixture and cells incubated for 6 hours at  
439 37°C, after which the medium was replaced with 15 ml complete DMEM medium. After 12 hours,  
440 this medium was replaced with 15 ml of complete DMEM medium, which was then harvested 24  
441 hr later after further growth. After addition of another 15 ml of medium, cells and virus were  
442 allowed to growth, ending with a second harvest of medium. The medium was cleared of debris  
443 by centrifugation at 5000 x g for 5 mins at room temperature and supernatants containing  
444 lentivirus stored at -80°C.

445

446 Ectopic stably expression of ACE2 and TMPRSS2 was achieved by transduction of SVG-A cells  
447 (gift from Walter J. Atwood, Brown University) gene-edited to simultaneously express

448 fluorescently tagged early and late endosomal markers EEA1 and NPC1 fused to mScarlett or  
449 Halo, respectively (21). Briefly, SVG-A  $1 \times 10^6$  cells were seeded in a well from a 6-well plate and  
450 grown overnight in MEM media with 10% FBS. Cleared medium containing ACE2 or TMPRSS2  
451 lentivirus (1 mL) was added to the cells and incubated for 16 h, following replacement with fresh  
452 medium cells were incubated for additional 24 hrs. Cells were allowed to grow for another 4 days  
453 in the presence of 7  $\mu\text{g}/\text{mL}$  puromycin to select for ACE2 expressing cells or 5  $\mu\text{g}/\text{mL}$  blasticidin  
454 for TMPRSS2 expressing cells. Surviving cells were grown in the absence of puromycin of  
455 blasticidin for 4 days and cell stocks frozen and kept in liquid nitrogen. SVG-A cells  
456 simultaneously stably expressing ACE2 and TMPRSS2 were obtained by transduction with  
457 lentivirus encoding TMPRSS2 and selection with Blasticidin of cells stably expressing ACE2.

458

#### 459 **Preparation of VSV chimeras for imaging and infection experiments**

460 All VSV-SARS-CoV-2 variants were grown in MA104 cells in 15 to 20 150-mm dishes and infected  
461 at a multiplicity of infection (MOI) of 0.01 as previously described (9, 13) in addition to the Omicron  
462 variant also grown in Vero TMPRSS2 cells. Briefly, media containing the viruses were collected  
463 72 hours post infection and clarified by centrifugation at 1,000 x g for 10 min at 4°C. A pellet with  
464 virus and extracellular particles was obtained by centrifugation in a Ti45 fixed-angle rotor at  
465 72,000 x g (25,000 rpm) for 2 hours at 4°C, then resuspended overnight in 0.5 mL PBS at 4°C.  
466 This solution was layered on top of a 15% sucrose-PBS solution and a pellet with virions obtained  
467 by centrifugation in a SW55 swinging-bucket rotor at 148,000 x g (35,000 rpm) for 2 hours at 4°C.  
468 The resulting pellet was resuspended overnight in 0.4 mL PBS at 4°C, layered on top of a 15 to  
469 45% sucrose-PBS linear gradient and subjected to centrifugation in a SW55 swinging-bucket rotor  
470 at 194,000 x g (40,000 rpm) for 1.5 hours at 4°C. The predominant light scattering band located  
471 in the lower one-third of the gradient and containing the virions was removed by side puncture of  
472 the gradient tube. Approximately 0.3 ml of this solution was mixed with 25 ml of PBS and  
473 subjected to centrifugation in a Ti60 fixed-angle rotor at 161,000 x g (40,000 rpm) for 2 hours at  
474 4°C. The final pellet was resuspended overnight in 0.2 - 0.5 mL PBS aliquoted and stored frozen  
475 at -80°C for use in subsequent imaging and infection experiments, without detectable change in  
476 infectivity.

477

#### 478 **Isolation and propagation of SARS-CoV-2**

479 A human isolate of SARS-CoV-2, Wuhan (B.1) was obtained in accordance with the protocol  
480 approved by the Helsinki University Hospital laboratory research permit 30 HUS/32/2018§16.  
481 Briefly, a nasopharyngeal swabs from a patient infected with COVID19 was suspended in 0.5 ml



482 of universal transport medium (UTM<sup>®</sup>, Copan Diagnostics) and used to inoculate Vero TMPRSS2\*  
483 cells for 1 h at 37°C, after which the inoculum was replaced with minimum essential medium  
484 (MEM) supplemented with 2% heat inactivated FBS, L-glutamine, penicillin, and streptomycin and  
485 virus allowed to grow for 48 hr. Virions in the supernatant (P0) were subjected to a similar second  
486 round of propagation (P1), analyzed by DNA sequencing, and aliquots stored at 80°C in a solution  
487 containing MEM, 2% heat inactivated FCS, 2 mM L-glutamine, and 1% penicillin-streptomycin.  
488 Extent of virus replication was determined by real-time PCR (RT-PCR) using primers for SARS-  
489 CoV-2 RNA-dependent RNA polymerase (RdRP) (40).

490

#### 491 **VSV-eGFP-SARS-CoV-2 infection assays**

492 Infection assays for the Wuhan, Delta or Omicron VSV-eGFP-SARS-CoV-2 chimeras were done  
493 at a final ~ 80% confluency of cells plated one day before the infection assay as previously  
494 described (9) and further explained in Supplementary Appendix S1.

495

#### 496 **SARS-CoV-2 infection assays**

497 All experiments with SARS-CoV-2 were performed in biosafety level 3 (BSL3) facilities at the  
498 University of Helsinki with appropriate institutional permits. Virus samples were obtained under  
499 Helsinki University Hospital laboratory research permit 30 HUS/32/2018§16. Infections were  
500 carried for 16 hours at 37°C with 5% CO<sub>2</sub>. Cells were then fixed with 4% paraformaldehyde in  
501 PBS for 30 min at room temperature before being processed for immunodetection of viral N  
502 protein, automated fluorescence imaging, and image analysis. The detailed protocol is outlined in  
503 the Supplementary Appendix S1.

504

#### 505 **VSV-SARS-CoV-2 Atto 565 labeling and single molecule Atto 565 dye calibration**

506 Stock solutions of VSV-SARS-CoV-2 and its variants at a concentration of ~150 µg/ml viral RNA  
507 were conjugated with Atto 565-NHS ester (Sigma-Aldrich, cat. 72464) as previously described  
508 (41). The number of Atto 565 molecules attached to a single virion was determined by comparing  
509 the total fluorescence intensities associated with a given virion and the fluorescence intensity  
510 associated with the last bleaching step of the same virion, as previously described (42, 43). A  
511 brief description of these steps are outlined in the Supplementary Appendix S1.

512

#### 513 **Trypsin cleavage of VSV-eGFP-SARS-CoV-2**

514 VSV-eGFP-SARS-CoV-2 and variants (as indicated in text) at a concentration 30 µg/mL virus  
515 RNA in a total volume of 100 µL in DMEM with 25 mM HEPES, pH 7.4 were incubated for 30 min

516 at 37°C with 1 µg/mL trypsin (Pierce trypsin, TPCK treated from Thermo scientific cat. PI20233).  
517 Trypsin activity was terminated with 10 µM Aprotinin (bovine lung, Sigma-Aldrich cat. A1153). The  
518 required concentration of trypsin was determined by trypsin serial dilution, aiming for the largest  
519 infectivity Vero cells whose endogenous cathepsin proteases activity had been inhibited with 20  
520 µM E-64 (Figure S19). Infections were done with VSV or its variants at a concentration of 0.5  
521 µg/mL (for Vero and Vero TMPRSS2) or 5 µg/mL virus RNA (for Caco-2 or Calu-3). When  
522 required, the trypsin cleaved VSV's were used together with infection inhibitors or for pH bypass  
523 experiments as described above.

524

### 525 ***In vitro* release of S1 from trypsin activated VSV-SARS-CoV-2**

526 VSV-eGFP-SARS-CoV-2-Atto 565 was incubated with trypsin at various concentrations for 30  
527 min and the reaction stopped by addition of aprotinin to a final concentration of 10 µM. Virus was  
528 then used to infect Vero cells with endogenous cathepsin proteases inhibited with 20 µM E-64 to  
529 determine maximum concentration of trypsin required to proteolytically activate the virus. Virus  
530 either without or with trypsin cleavage, or with ACE2 bound before and after trypsin cleavage  
531 were plated onto a poly-D-lysine coated glass to determine the number of Atto 565 fluorescence  
532 dyes associated with each one of the single particles using spinning disc confocal microscopy. At  
533 least 8,000 particles were imaged per experimental condition to guarantee the ability to distinguish  
534 intensity losses of at least 20%. Every experimental condition was repeated in triplicate and the  
535 intensity of the mean intensities of the peak Gaussian fit was used to determine the after and  
536 deviation of Atto565 dyes per condition, Figure S19.

537

538 A computation simulation was performed to validate the ability to detect with statistical  
539 significance a 20% fluorescence intensity loss approximate equivalent to the 20-30% loss  
540 observed *in vivo* with virions when attached to the cell surface of Vero TMPRSS2. Experimental  
541 data corresponding to 8,845 undigested control virions were used to generate a probability density  
542 function from which 9 fit parameters (3 mean intensities with corresponding sigmas and the  
543 relative contribution to the distribution) were obtained by fitting the sum of 3 Gaussian  
544 distributions. These parameters were then used to generate 8845 random numbers of the same  
545 distribution and compared to the experimental data set to illustrate the accuracy of the simulation.  
546 A second set of 8845 random numbers were generated with mean intensities reduced by 20%, to  
547 generate a probability density distribution representing the fluorescence intensities after ACE2  
548 mediated release of S cleavage by TMPRSS2.

549

550 **Nasal pH and temperature measurements**

551 The pH and temperature of the nasal cavity, close to the under lower turbinate, from each nostril  
552 from 17 healthy volunteers, age 26-55, males and females, were determined using a Digitrapper  
553 pH 400 recorder (Medtronic) connected to a single-use Versaflex disposal dual sensor pH  
554 catheter (Medtronic) and a Beurer FT 15/1digital thermometer (Beurer), respectively. The  
555 temperature dependent pH response of the Digtrapper was corrected to consider the temperature  
556 in the nostrils determined for each volunteer.

557

558 These measurements were obtained under the ethical permit n. HUS/2502/2020 granted by the  
559 ethical committee of Helsinki and Uusimaa hospital district to Ahmed Geneid and Markku Patjas  
560 at the Helsinki University Hospital.

561

562 **Preparation of glass coverslips**

563 Infection and uptake assays of VSV-eGFP-SARS-CoV-2 and VSV-P-eGFP-SARS-CoV-2 done  
564 by spinning disc confocal microscopy visualization, were performed using 25 mm #1.5 coverslips  
565 bound with polydimethylsiloxane (PDMS) of about 1 mm in thickness and of 3 mm (infection) or  
566 5 mm (uptake) in diameter wells punched as previously described (9) (see also in Supplementary  
567 Appendix S1).

568

569 **Live cell spinning disc-confocal microscopy**

570 Visualization experiments were done with an inverted spinning disc confocal microscope (42)  
571 following the details described in Supplementary Appendix S1.

572

573 **Live cell lattice light sheet microscopy**

574 Cells were plated in a 35 mm culture dish containing 5 mm in diameter glass coverslips to achieve  
575 60% final confluency the day of each experiment. Immediately before lattice light sheet  
576 visualization, the cover slip was placed on top of parafilm placed in a 10 cm in diameter petri dish  
577 including wet chem wipes to maintain humidity. Approximately 10  $\mu$ L of a solution containing VSV-  
578 SARS-CoV-2 in DMEM with 25 mM HEPES at pH 7.4 for the times indicated in the text, after  
579 which the coverslips were transferred to the imaging stage of the LLSM. Visualization was done  
580 using phenol red free media, (FluoroBrite™) supplemented with 5% FBS and 25 mM HEPES at  
581 the indicated pH. Imaging was done at 37°C in the presence of 5% CO<sub>2</sub> and 100 nM fluorescent  
582 Alexa 647 or Alexa 549 dyes added to the medium to determine the cell boundary. The LLSM  
583 was operated in sample scan mode with 0.5  $\mu$ m spacing between each plane along the z-imaging

584 axis and samples imaged as a time series of stacks acquired 1 to 5 sec using dithered multi-  
585 Bessel lattice light sheet illumination (40, 43). When using gene edited SVG-A cells expressing  
586 EEA1-Scarlett and NPC1-Halo, Halo was first labeled by incubation of the cells with 200 nM  
587 JFX646 for 30 minutes at 37°C and 5% CO<sub>2</sub> followed by three 2-minute washes with DMEM  
588 containing 10% FBS, 25 mM HEPES, pH 7.4 within 2 hours prior to virus addition to the cover  
589 slip. Time series containing 120-300 z-stacks, sequentially obtained every 1-5 sec were acquired  
590 with ~ 10 ms exposures per channel.

591  
592 The following protocol was used to determine the dwell time between binding of trypsin activated  
593 VSV-SARS-CoV-2-Atto 565 Wuhan and release of the S-fragment. Briefly, trypsin activated  
594 virions at 5 µg/mL viral RNA were flowed on top of Vero cells plated in a homemade microfluidic  
595 flow cell one day prior to the experiment to achieve a 90% confluency. Soluble 100 nM Alexa 549  
596 added to the medium was used to determine the cell outline. Samples were imaged with an AO-  
597 LLSM microscope configured for sample scan imaging to acquire every 4 sec a stack with planes  
598 separated by 0.6 µm (0.3 µm along the z-optical axis) using an exposure of 3 ms/plane.

599

#### 600 **Single virus tracking and image analysis**

601 The 3D stacks obtained using LLSM were deskewed and the diffraction limited spots were  
602 detected and tracked in three dimensions using the automated detection algorithms that uses  
603 least-squares minimization numerical fitting with a model of the microscope PSF approximated  
604 by a 3D Gaussian function and implemented using the MATLAB developed previously (40)  
605 available for download ([https://github.com/VolkerKirchheim/TrackBrowser\\_Matlab.git](https://github.com/VolkerKirchheim/TrackBrowser_Matlab.git)).  
606 Estimated fluorescent intensities associated with each spot were calculated from the  
607 corresponding amplitudes of the fitted 3D Gaussian and compared to those from single virions  
608 bound to poly-D-lysine coated glass imaged under the same acquisition conditions and whose  
609 dye content was determined by single bleaching steps (43).

610  
611 Tracks with intensities corresponding to single virus were exported into a custom-made program  
612 written in LabView for visualizing trajectories available for download  
613 ([https://github.com/VolkerKirchheim/TrackBrowser\\_LabView.git](https://github.com/VolkerKirchheim/TrackBrowser_LabView.git)). Each virus trajectory was  
614 visually examined for co-localization within a specific compartment (cell surface, EEA1 early  
615 endosomes or NPC-1 late endosomes/lysosomes, cytosol) and the mean squared displacements  
616 (MSDs) were calculated from all 3D coordinates for all possible time frames within that

617 compartment. A non-linear relationship between MSD and time for anomalous diffusion was fitted  
618 to the MSD data according to the power law in equation:

619 
$$MSD(t) = 6 K t^\alpha$$

620 where  $K$  is the generalized diffusion coefficient and  $\alpha$  is the anomalous exponent.

621

622 **Statistical analysis**

623 An unpaired t-test was used to determine the statistical significance in the difference between  
624 control and experimental values.

625 **FIGURE LEGENDS:**

626 **Figure 1. SARS-CoV-2 infection requires endocytosis**

627 **(A)** Schematic of live-cell volumetric lattice-light-sheet fluorescence microscopy (LLSM) imaging  
628 experiments **(B-G)** used to obtain 3D time series of VSV-eGFP-P-SARS-CoV-2-S-Atto 565 entry  
629 into VERO TMRSS2 cells during early stages of infection using an MOI of 2. For each  
630 experiment, three cells were consecutively imaged volumetrically every 4.7 seconds for 10 min.

631 **(B)** Maximum intensity projections showing fluorescently tagged VSV-SARS-CoV-2 within 1  $\mu$ m  
632 in thickness optical sections from the first frame of the time series acquired for representative  
633 cells 1, 2 and 3.

634 **(C)** Representative single virion trajectories of VSV-eGFP-P-SARS-CoV-2-S-Atto 565 within a 1  
635  $\mu$ m optical slice of a time series acquired during the first 10-minutes of cell 1. Traces highlight  
636 particles at the cell surface (black) and within the cell volume after endocytosis (blue), in both  
637 cases containing colocalized eGFP-P and S-Atto 565; it also shows traces in the cytosol (green)  
638 containing eGFP-P upon its separation from the Atto565 signal (light blue). Single images  
639 highlighting these events are shown in the panels below.

640 **(D)** Orthogonal projection of the traced event highlighted in **(C)**.

641 **(E)** Representative summary of 266 virion traces analyzed during cell entry. Data from single  
642 coverslips (out of five) obtained per each cell type are shown. Vertical traces highlight the transfer  
643 of virions from the cell surface to the cell interior (assumed to be in endosomes because the  
644 colocalization of the eGFP-P with S-Atto 565 signals) or from endosomes to the cytosol (upon  
645 loss of localization of the eGFP-P and S-Atto 565 signals). Events corresponding to step wise  
646 loss of the S-Atto 565 signal at the cell surface are indicated (yellow).

647 **(F)** Representative plot illustrating the mean squared displacements (MSD) for the trajectory  
648 depicted in **(D)** when the particle is at the cell surface (black), in endosomes (blue), or in the  
649 cytosol upon separation of eGFP-P (which remains in endosomes, light blue) and S-Atto565 in  
650 the cytosol (green).

651 **(G)** Summary dot plot showing the diffusion mode ( $\alpha$ ) for 1692 virion trajectories and  
652 corresponding 139 penetration events; all penetration events occurred from endosomes except  
653 for one event at the cell surface in a single Vero TMRSS2 cell. The plot highlights the confined  
654 motion ( $\alpha < 0.80$ ) of virions at the cell surface, trajected motion ( $\alpha > 1.2$ ) in endosomes, and  
655 Brownian motion ( $0.80 < \alpha < 1.2$ ) in the cytosol.

656 **(H-J)** Effect of inhibition of endocytosis in the infection by VSV-eGFP-SARS-CoV-2 **(H,I)** or a  
657 human isolate of SARS-CoV-2 **(J)**. Top panel shows examples of infection observed in  
658 representative fields of Vero TMRSS2 over expressing or not the dominant negative dynamin

659 K44A mutant or treated or not with 40  $\mu$ M dynasore-OH. Images in the top panels were obtained  
660 using spinning disc confocal microscopy and show maximum intensity projections. Results from  
661 similar infections obtained with different cell types are shown in the bottom panel. The difference  
662 of results between control conditions and inhibition of endocytosis by K44A dynamin  
663 overexpression or incubation with dynasore-OH incubation was statistically significant with p  
664 value of <0.001 using an unpaired t-test.

665

666 **Figure 2. Endocytic entry routes of VSV-SARS-CoV-2.** VSV-eGFP-P-SARS-CoV-2 was used  
667 to infect SVG-A gene-edited to express early endosomal antigen 1 fused to the fluorescent protein  
668 Scarlet (EEA1-Scarlett) as an early endosomal marker and for late endosomal/lysosomal  
669 compartments a Halo-tagged version of the cholesterol transporter Niemann Pick C1 (NPC1-  
670 Halo) together with ectopic expression of ACE2 and TMPRSS2 and volumetrically imaged using  
671 LLSM according to Fig. 1.

672 **(A)** Representative 2  $\mu$ m projection from the first frame of the time series acquired 8-min after  
673 inoculation.

674 **(B-E)** Representative examples of single trajectories of VSV-eGFP-P-SARS-CoV-2 highlighting  
675 the extent of colocalization between eGFP-P and EEA1 or between eGFP-P and NPC-1 Halo  
676 labeled with JFX646 (top panel), the orthogonal projection of the trajectory (middle panel) and  
677 corresponding plots for number of VSV particles on the spot, extent of colocalizations and MSD  
678 (bottom panels). Additional examples found in related Fig S11-16.

679 **(F)** Representative summary of results for 257 and 373 virion traces analyzed during cell entry  
680 from single coverslips (out of a total of five) plated with SVG-A ACE2 or SVG-A ACE2 TMPRSS2.  
681 Vertical and diagonal traces highlight the transfer of virions from the cell surface to its interior and  
682 associated with early or late endosomes/lysosomes as defined by colocalization of eGFP-P with  
683 EEA1-Scarlett or eGFP-P with NPC1-Halo, respectively.

684

685 **Figure 3. Surface entry route of SARS-CoV-2**

686 **(A-G)** VSV-eGFP-P-SARS-CoV-2-S-Atto 565 was used to infect Vero TMPRSS2 cells and used  
687 to study the effect by acidic pH in the medium on the TMPRSS2 mediated surface release of the  
688 S-fragment, on cellular location of fusion and genome delivery and on infectivity.

689 **(A, B)** Single virion trajectories of VSV-eGFP-P-SARS-CoV-2-Atto565 in a Vero TMPRSS2 cell  
690 incubated at pH 6.8 showing in **(A)** an example of S-release at the surface without subsequent  
691 fusion and **(B)** an example of S-release followed by penetration of eGFP-P to the cytosol.

692 Orthogonal views of the tracings and corresponding time-dependent fluorescent intensities for S-  
693 Atto 565 and eGFP-P are shown.

694 **(C)** Representative summary from 237 virion traces analyzed during cell entry. Data from single  
695 coverslips (out of five) obtained per each pH condition in the medium are shown. Vertical traces  
696 of cells incubated at 6.8 highlight the efficient transfer of virions from the cell surface to the cell  
697 interior (based on loss of signal colocalization between eGFP-P and S-Atto 565 and  
698 corresponding change of diffusion from constrained to directed). Events of stepwise partial loss  
699 of S-Atto 565 are indicated (yellow). Similar data with cells incubated at pH 6.2 shows  
700 accumulation of virions in endosomes, complete absence of fusion events from the cell surface  
701 and limited number of fusion events from endosomes.

702 **(D)** Data showing fraction of virions that released the S-fragment from virions at the cell surface  
703 of Vero TMPRSS2 cells incubated at pH 6.8 in the absence or presence of 10  $\mu$ M Camostat, or  
704 of Vero E6, Caco-2 or Calu-3 cells also at pH 6.8 and in the absence of Camostat. The difference  
705 of results between control and all other conditions was statistically significant with p value of  
706  $<0.0001$  using an unpaired t-test.

707 **(E)** Cumulative plot corresponding to the dwell time between the stepwise partial drop of the S-  
708 Atto 565 signal of a virion at the cell surface and fusion defined by surface spreading of the  
709 remaining Atto 565 signal and transfer into the cytosol of eGFP-P. Data from 86 traces and from  
710 five experiments.

711 **(F)** Effect of extracellular pH on the transfer of eGFP-P of virions from the cell surface (red) or  
712 from endosomes (black) to the cytosol. Each dot represents average  $\pm$  std from 5 coverslips  
713 with 3 cells imaged per coverslip and at least 600 virus tracked per condition. Line across box  
714 represents the median of distribution and the top and bottom represent the quartiles.

715 **(G)** Effect of extracellular pH of the cell medium on the mode of diffusion of the eGFP-P signal  
716 associated with a virion before and after delivery from the surface (red) or from endosomes (black)  
717 to the cytosol.

718 **(H)** pH bypass infection experiments to test the effect of extracellular acidic pH on the extent of  
719 infection of Vero or Vero TMPRSS2 cells by VSV-eGFP-SARS-CoV-2 alone or treated for 30 min  
720 with 1  $\mu$ g/mL trypsin; experiments carried in the absence (top panel) or presence (middle and  
721 bottom panels) of 40  $\mu$ M dynasore-OH. Each data point represents an experiment. In each case,  
722 the values determined at pH 6.8 and 7.4 are significantly different with a p value of at least  $<0.0003$   
723 using an unpaired t-test.

724 **(I)** pH bypass infection experiment using authentic SARS-CoV-2 and Vero TMPRSS2\* cells in the  
725 absence or presence of 40  $\mu$ M dynasore-OH. Each data point represents an experiment. No



726 statistical difference was observed in the absence of dynasore-OH between pH 6.8 and pH 7.4  
727 ( $p = 0.13$ ); the difference was statistically significant in the presence of dynasore-OH ( $p < 0.0001$ )  
728 using an unpaired t-test.

729

730 **Figure 4. Entry routes of VSV-SARS-CoV-2 variants are conserved.**

731 **(A-C)** Effect of extracellular pH and type of cells infected with the indicated variants of VSV-eGFP-  
732 P-SARS-CoV-2 on **(A)** the extent of S-fragment release from the cell surface and of **(B)** fusion  
733 from the cell surface or **(C)** from endosomes.

734 **(D)** Experiments to determine the effect of extracellular pH on the extent of infection by the Delta  
735 and Omicron variants of VSV-SARS-CoV-2 in the presence of 40  $\mu$ M dynasore-OH. The pH  
736 bypass experiments in the right panel were done with trypsin-cleaved virions. The bottom two  
737 rows compare results obtained with the Omicron variant grown in MA104 or Vero TMPRSS2 cells.  
738 Western Blot showing cleavage states of spike protein of VSV-SARS-CoV-2-Omicron grown in  
739 different cell types. The bypass pH experiments in the left panels show statistical differences  
740 between pH 6.8 and pH 7.4 ( $p < 0.0001$ ) for Delta and Omicron grown in Vero TMPRSS2 and  
741 of minimal significance for Omicron grown MA 104 using an unpaired t-test. Similar analysis for  
742 the experiments in the right panels show statistical differences between pH 6.8 and pH 7.4 for  
743 Delta ( $p < 0.0001$ ) and Omicron grown in Vero TMPRSS2 ( $p < 0.0001$ ) and also for Omicron (P  
744 = 0.0015) grown in MA 104.

745 **(E)** Nasal pH values determined from 17 healthy individuals. Each dot represents a single pH  
746 determination by the pH catheter at the lower turbinate of the right and left nostrils.

747

748 **Figure 5. Schematic representation of the principal entry routes SARS-CoV-2 uses for**

749 **infection.** Entry starts with membrane attachment and ends with spike-protein (S) catalyzed  
750 membrane fusion releasing the viral contents into the cytosol. Fusion activity depends on two  
751 proteolytic cleavage steps, one typically carried out by furin in the producing cell and the second  
752 by TMPRSS2 on the cell surface or in endosomes of the target cell. Alternatively, endosomal  
753 cathepsins can carry out both cleavages. Exposure of the virus to an acidic milieu is essential for  
754 membrane fusion, genome penetration, and productive infection. Fusion and penetration occur  
755 only in acidic early and late endosomal/lysosomal compartments but not at the cell surface, even  
756 when the furin and TMPRSS2 cleavages have both occurred. Fusion and penetration can occur  
757 at the cell surface of cells expressing TMPRSS2 if the extracellular pH is  $\sim 6.8$ .

758

## 759 REFERENCES

760

- 761 1. M. Hoffmann, H. Kleine-Weber, S. Schroeder, N. Krüger, T. Herrler, S. Erichsen, T. S.  
762 Schiergens, G. Herrler, N.-H. Wu, A. Nitsche, M. A. Müller, C. Drosten, S. Pöhlmann, SARS-  
763 CoV-2 Cell Entry Depends on ACE2 and TMPRSS2 and Is Blocked by a Clinically Proven  
764 Protease Inhibitor. *Cell*. 181, 271-280.e8 (2020).
- 765 2. D. Wrapp, N. Wang, K. S. Corbett, J. A. Goldsmith, C.-L. Hsieh, O. Abiona, B. S. Graham, J.  
766 S. McLellan, Cryo-EM structure of the 2019-nCoV spike in the prefusion conformation. *Science*.  
767 367, 1260–1263 (2020).
- 768 3. J. Yang, S. J. L. Petitjean, M. Koehler, Q. Zhang, A. C. Dumitru, W. Chen, S. Derclaye, S. P.  
769 Vincent, P. Soumillion, D. Alsteens, Molecular interaction and inhibition of SARS-CoV-2 binding  
770 to the ACE2 receptor. *Nat Commun*. 11, 4541 (2020).
- 771 4. R. Yan, Y. Zhang, Y. Li, L. Xia, Y. Guo, Q. Zhou, Structural basis for the recognition of SARS-  
772 CoV-2 by full-length human ACE2. *Sci New York N Y*. 367, 1444–1448 (2020).
- 773 5. J. Shang, Y. Wan, C. Luo, G. Ye, Q. Geng, A. Auerbach, F. Li, Cell entry mechanisms of  
774 SARS-CoV-2. *P Natl Acad Sci Usa*. 117, 11727–11734 (2020).
- 775 6. C. B. Jackson, M. Farzan, B. Chen, H. Choe, Mechanisms of SARS-CoV-2 entry into cells.  
776 *Nat Rev Mol Cell Biology*. 23, 3–20 (2022).
- 777 7. B. A. Johnson, X. Xie, A. L. Bailey, B. Kalveram, K. G. Lokugamage, A. Muruato, J. Zou, X.  
778 Zhang, T. Juelich, J. K. Smith, L. Zhang, N. Bopp, C. Schindewolf, M. Vu, A. Vanderheiden, E.  
779 S. Winkler, D. Swetnam, J. A. Plante, P. Aguilar, K. S. Plante, V. Popov, B. Lee, S. C. Weaver,  
780 M. S. Suthar, A. L. Routh, P. Ren, Z. Ku, Z. An, K. Debbink, M. S. Diamond, P.-Y. Shi, A. N.  
781 Freiberg, V. D. Menachery, Loss of furin cleavage site attenuates SARS-CoV-2 pathogenesis.  
782 *Nature*. 591, 293–299 (2021).
- 783 8. R. Zang, M. F. G. Castro, B. T. McCune, Q. Zeng, P. W. Rothlauf, N. M. Sonnek, Z. Liu, K. F.  
784 Brulois, X. Wang, H. B. Greenberg, M. S. Diamond, M. A. Ciorba, S. P. J. Whelan, S. Ding,  
785 TMPRSS2 and TMPRSS4 promote SARS-CoV-2 infection of human small intestinal  
786 enterocytes. *Sci Immunol*. 5, eabc3582 (2020).
- 787 9. A. J. B. Kreuzberger, A. Sanyal, R. Ojha, J. D. Pyle, O. Vapalahti, G. Balistreri, T.  
788 Kirchhausen, Synergistic Block of SARS-CoV-2 Infection by Combined Drug Inhibition of the  
789 Host Entry Factors PIKfyve Kinase and TMPRSS2 Protease. *J Virol*. 95, e0097521 (2021).
- 790 10. X. Ou, Y. Liu, X. Lei, P. Li, D. Mi, L. Ren, L. Guo, R. Guo, T. Chen, J. Hu, Z. Xiang, Z. Mu,  
791 X. Chen, J. Chen, K. Hu, Q. Jin, J. Wang, Z. Qian, Characterization of spike glycoprotein of  
792 SARS-CoV-2 on virus entry and its immune cross-reactivity with SARS-CoV. *Nat Commun*. 11,  
793 1620 (2020).
- 794 11. T. P. Peacock, D. H. Goldhill, J. Zhou, L. Baillon, R. Frise, O. C. Swann, R. Kugathasan, R.  
795 Penn, J. C. Brown, R. Y. Sanchez-David, L. Braga, M. K. Williamson, J. A. Hassard, E. Staller,  
796 B. Hanley, M. Osborn, M. Giacca, A. D. Davidson, D. A. Matthews, W. S. Barclay, The furin

- 797 cleavage site in the SARS-CoV-2 spike protein is required for transmission in ferrets. *Nat*  
798 *Microbiol.* 6, 899–909 (2021).
- 799 12. D. Bestle, M. R. Heindl, H. Limburg, T. V. L. van, O. Pilgram, H. Moulton, D. A. Stein, K.  
800 Harges, M. Eickmann, O. Dolnik, C. Rohde, H.-D. Klenk, W. Garten, T. Steinmetzer, E.  
801 Böttcher-Friebertshäuser, TMPRSS2 and furin are both essential for proteolytic activation of  
802 SARS-CoV-2 in human airway cells. *Life Sci Alliance.* 3, e202000786 (2020).
- 803 13. J. B. Case, P. W. Rothlauf, R. E. Chen, Z. Liu, H. Zhao, A. S. Kim, L.-M. Bloyet, Q. Zeng, S.  
804 Tahan, L. Droit, Ma. X. G. Ilagan, M. A. Tartell, G. Amarasinghe, J. P. Henderson, S. Miersch,  
805 M. Ustav, S. Sidhu, H. W. Virgin, D. Wang, S. Ding, D. Corti, E. S. Theel, D. H. Fremont, M. S.  
806 Diamond, S. P. J. Whelan, Neutralizing Antibody and Soluble ACE2 Inhibition of a Replication-  
807 Competent VSV-SARS-CoV-2 and a Clinical Isolate of SARS-CoV-2. *Cell Host Microbe.* 28,  
808 475-485.e5 (2020).
- 809 14. B.-C. Chen, W. R. Legant, K. Wang, L. Shao, D. E. Milkie, M. W. Davidson, C.  
810 Janetopoulos, X. S. Wu, J. A. H. III, Z. Liu, B. P. English, Y. Mimori-Kiyosue, D. P. Romero, A.  
811 T. Ritter, J. Lippincott-Schwartz, L. Fritz-Laylin, R. D. Mullins, D. M. Mitchell, J. N. Bembenek,  
812 A.-C. Reymann, R. Böhme, S. W. Grill, J. T. Wang, G. Seydoux, U. S. Tulu, D. P. Kiehart, E.  
813 Betzig, Lattice light-sheet microscopy: Imaging molecules to embryos at high spatiotemporal  
814 resolution. *Science.* 346, 1257998 (2014).
- 815 15. C. J. Bradish, J. B. Kirkham, The Morphology of Vesicular Stomatitis Virus (Indiana C)  
816 Derived from Chick Embryos or Cultures of BHK21/13 Cells. *Microbiology+*. 44, 359–371  
817 (1966).
- 818 16. D. K. Cureton, R. H. Massol, S. P. J. Whelan, T. Kirchhausen, The Length of Vesicular  
819 Stomatitis Virus Particles Dictates a Need for Actin Assembly during Clathrin-Dependent  
820 Endocytosis. *Plos Pathog.* 6, e1001127 (2010).
- 821 17. J. Klumperman, G. Raposo, The Complex Ultrastructure of the Endolysosomal System. *Csh*  
822 *Perspect Biol.* 6, a016857 (2014).
- 823 18. S. M. Ferguson, P. D. Camilli, Dynamin, a membrane-remodelling GTPase. *Nat Rev Mol*  
824 *Cell Bio.* 13, 75–88 (2012).
- 825 19. H. Damke, T. Baba, D. E. Warnock, S. L. Schmid, Induction of mutant dynamin specifically  
826 blocks endocytic coated vesicle formation. *J Cell Biology.* 127, 915–934 (1994).
- 827 20. E. Macia, M. Ehrlich, R. Massol, E. Boucrot, C. Brunner, T. Kirchhausen, Dynasore, a Cell-  
828 Permeable Inhibitor of Dynamin. *Dev Cell.* 10, 839–850 (2006).
- 829 21. Y.-L. Kang, Y. Chou, P. W. Rothlauf, Z. Liu, T. K. Soh, D. Cureton, J. B. Case, R. E. Chen,  
830 M. S. Diamond, S. P. J. Whelan, T. Kirchhausen, Inhibition of PIKfyve kinase prevents infection  
831 by Zaire ebolavirus and SARS-CoV-2. *Proc National Acad Sci.* 117, 20803–20813 (2020).
- 832 22. R. Zang, J. B. Case, E. Yutuc, X. Ma, S. Shen, M. F. G. Castro, Z. Liu, Q. Zeng, H. Zhao, J.  
833 Son, P. W. Rothlauf, A. J. B. Kreuzberger, G. Hou, H. Zhang, S. Bose, X. Wang, M. D. Vahey,  
834 K. Mani, W. J. Griffiths, T. Kirchhausen, D. H. Fremont, H. Guo, A. Diwan, Y. Wang, M. S.

- 835 Diamond, S. P. J. Whelan, S. Ding, Cholesterol 25-hydroxylase suppresses SARS-CoV-2  
836 replication by blocking membrane fusion. *P Natl Acad Sci Usa*. 117, 32105–32113 (2020).
- 837 23. S. Belouzard, V. C. Chu, G. R. Whittaker, Activation of the SARS coronavirus spike protein  
838 via sequential proteolytic cleavage at two distinct sites. *Proc National Acad Sci*. 106, 5871–5876  
839 (2009).
- 840 24. Y. Liu, H.-Q. Qu, J. Qu, L. Tian, H. Hakonarson, Expression Pattern of the SARS-CoV-2  
841 Entry Genes ACE2 and TMPRSS2 in the Respiratory Tract. *Viruses*. 12, 1174 (2020).
- 842 25. S. P. Sajuthi, P. DeFord, Y. Li, N. D. Jackson, M. T. Montgomery, J. L. Everman, C. L. Rios,  
843 E. Pruesse, J. D. Nolin, E. G. Plender, M. E. Wechsler, A. C. Y. Mak, C. Eng, S. Salazar, V.  
844 Medina, E. M. Wohlford, S. Huntsman, D. A. Nickerson, S. Germer, M. C. Zody, G. Abecasis, H.  
845 M. Kang, K. M. Rice, R. Kumar, S. Oh, J. Rodriguez-Santana, E. G. Burchard, M. A. Seibold,  
846 Type 2 and interferon inflammation regulate SARS-CoV-2 entry factor expression in the airway  
847 epithelium. *Nat Commun*. 11, 5139 (2020).
- 848 26. R. J. A. England, J. J. Homer, L. C. Knight, S. R. Ell, Nasal pH measurement: a reliable and  
849 repeatable parameter. *Clin Otolaryngology Allied Sci*. 24, 67–68 (1999).
- 850 27. B.-G. Kim, J.-H. Kim, S.-W. Kim, S.-W. Kim, K.-S. Jin, J.-H. Cho, J.-M. Kang, S.-Y. Park,  
851 Nasal pH in patients with chronic rhinosinusitis before and after endoscopic sinus surgery. *Am J*  
852 *Otolaryng*. 34, 505–507 (2013).
- 853 28. I. Glowacka, S. Bertram, M. A. Müller, P. Allen, E. Soilleux, S. Pfefferle, I. Steffen, T. S.  
854 Tsegaye, Y. He, K. Gnirss, D. Niemeyer, H. Schneider, C. Drosten, S. Pöhlmann, Evidence that  
855 TMPRSS2 Activates the Severe Acute Respiratory Syndrome Coronavirus Spike Protein for  
856 Membrane Fusion and Reduces Viral Control by the Humoral Immune Response. *J Virol*. 85,  
857 4122–4134 (2011).
- 858 29. G. Simmons, S. Bertram, I. Glowacka, I. Steffen, C. Chaipan, J. Agudelo, K. Lu, A. J.  
859 Rennekamp, H. Hofmann, P. Bates, S. Pöhlmann, Different host cell proteases activate the  
860 SARS-coronavirus spike-protein for cell–cell and virus–cell fusion. *Virology*. 413, 265–274  
861 (2011).
- 862 30. J. K. Millet, G. R. Whittaker, Host cell entry of Middle East respiratory syndrome coronavirus  
863 after two-step, furin-mediated activation of the spike protein. *Proc National Acad Sci*. 111,  
864 15214–15219 (2014).
- 865 31. D. L. Floyd, J. R. Ragains, J. J. Skehel, S. C. Harrison, A. M. van Oijen, Single-particle  
866 kinetics of influenza virus membrane fusion. *Proc National Acad Sci*. 105, 15382–15387 (2008).
- 867 32. T. Ivanovic, J. L. Choi, S. P. Whelan, A. M. van Oijen, S. C. Harrison, Influenza-virus  
868 membrane fusion by cooperative fold-back of stochastically induced hemagglutinin  
869 intermediates. *Elife*. 2, e00333 (2013).
- 870 33. L. H. Chao, D. E. Klein, A. G. Schmidt, J. M. Peña, S. C. Harrison, Sequential  
871 conformational rearrangements in flavivirus membrane fusion. *Elife*. 3, e04389 (2014).

- 872 34. I. S. Kim, S. Jenni, M. L. Stanifer, E. Roth, S. P. J. Whelan, A. M. van Oijen, S. C. Harrison,  
873 Mechanism of membrane fusion induced by vesicular stomatitis virus G protein. *Proc National*  
874 *Acad Sci.* 114, E28–E36 (2017).
- 875 35. B. Meng, A. Abdullahi, I. A. T. M. Ferreira, N. Goonawardane, A. Saito, I. Kimura, D.  
876 Yamasoba, P. P. Gerber, S. Fatihi, S. Rathore, S. K. Zepeda, G. Papa, S. A. Kemp, T. Ikeda, M.  
877 Toyoda, T. S. Tan, J. Kuramochi, S. Mitsunaga, T. Ueno, K. Shirakawa, A. Takaori-Kondo, T.  
878 Brevini, D. L. Mallery, O. J. Charles, T. C.-N. B. C.-19 Collaboration, S. Baker, G. Dougan, C.  
879 Hess, N. Kingston, P. J. Lehner, P. A. Lyons, N. J. Matheson, W. H. Ouwehand, C. Saunders,  
880 C. Summers, J. E. D. Thaventhiran, M. Toshner, M. P. Weekes, P. Maxwell, A. Shaw, A. Bucke,  
881 J. Calder, L. Cannà, J. Domingo, A. Elmer, S. Fuller, J. Harris, S. Hewitt, J. Kennet, S. Jose, J.  
882 Kourampa, A. Meadows, C. O'Brien, J. Price, C. Publico, R. Rastall, C. Ribeiro, J. Rowlands, V.  
883 Ruffolo, H. Tordesillas, B. Bullman, B. J. Dunmore, S. Gräf, J. Hodgson, C. Huang, K. Hunter,  
884 E. Jones, E. Legchenko, C. Matarà, J. Martin, F. Mescia, C. O'Donnell, L. Pointon, J. Shih, R.  
885 Sutcliffe, T. Tilly, C. Treacy, Z. Tong, J. Wood, M. Wylot, A. Betancourt, G. Bower, C. Cossetti,  
886 A. D. Sa, M. Epping, S. Fawke, N. Gleadall, R. Grenfell, A. Hinch, S. Jackson, I. Jarvis, B.  
887 Krishna, F. Nice, O. Omarjee, M. Perera, M. Potts, N. Richoz, V. Romashova, L. Stefanucci, M.  
888 Strezlecki, L. Turner, E. M. D. D. Bie, K. Bunclark, M. Josipovic, M. Mackay, H. Butcher, D.  
889 Caputo, M. Chandler, P. Chinnery, D. Clapham-Riley, E. Dewhurst, C. Fernandez, A. Furlong,  
890 B. Graves, J. Gray, S. Hein, T. Ivers, E. L. Gresley, R. Linger, M. Kasanicki, R. King, S. Meloy,  
891 A. Moulton, F. Muldoon, N. Ovington, S. Papadia, C. J. Penkett, I. Phelan, V. Ranganath, R.  
892 Paraschiv, A. Sage, J. Sambrook, I. Scholtes, K. Schon, H. Stark, K. E. Stirrups, P. Townsend,  
893 N. Walker, J. Webster, T. G. to P. J. (G2P-J. Consortium, E. P. Butlertanaka, Y. L. Tanaka, J.  
894 Ito, K. Uriu, Y. Kosugi, M. Suganami, A. Oide, M. Yokoyama, M. Chiba, C. Motozono, H.  
895 Nasser, R. Shimizu, K. Kitazato, H. Hasebe, T. Irie, S. Nakagawa, J. Wu, M. Takahashi, T.  
896 Fukuhara, K. Shimizu, K. Tsushima, H. Kubo, Y. Kazuma, R. Nomura, Y. Horisawa, K. Nagata,  
897 Y. Kawai, Y. Yanagida, Y. Tashiro, K. Tokunaga, S. Ozono, R. Kawabata, N. Morizako, K.  
898 Sadamasu, H. Asakura, M. Nagashima, K. Yoshimura, E.-C. Consortium, P. Cárdenas, E.  
899 Muñoz, V. Barragan, S. Márquez, B. Prado-Vivar, M. Becerra-Wong, M. Caravajal, G. Trueba,  
900 P. Rojas-Silva, M. Grunauer, B. Gutierrez, J. J. Guadalupe, J. C. Fernández-Cadena, D.  
901 Andrade-Molina, M. Baldeon, A. Pinos, J. E. Bowen, A. Joshi, A. C. Walls, L. Jackson, D.  
902 Martin, K. G. C. Smith, J. Bradley, J. A. G. Briggs, J. Choi, E. Madissoon, K. B. Meyer, P.  
903 Mlcochova, L. Ceron-Gutierrez, R. Doffinger, S. A. Teichmann, A. J. Fisher, M. S. Pizzuto, A. de  
904 Marco, D. Corti, M. Hosmillo, J. H. Lee, L. C. James, L. Thukral, D. Veessler, A. Sigal, F.  
905 Sampaziotis, I. G. Goodfellow, K. Sato, R. K. Gupta, Altered TMPRSS2 usage by SARS-CoV-2  
906 Omicron impacts infectivity and fusogenicity. *Nature.* 603, 706–714 (2022).
- 907 36. H. Zhao, L. Lu, Z. Peng, L.-L. Chen, X. Meng, C. Zhang, J. D. Ip, W.-M. Chan, A. W.-H.  
908 Chu, K.-H. Chan, D.-Y. Jin, H. Chen, K.-Y. Yuen, K. K.-W. To, SARS-CoV-2 Omicron variant  
909 shows less efficient replication and fusion activity when compared with Delta variant in  
910 TMPRSS2-expressed cells. *Emerg Microbes Infec.* 11, 277–283 (2022).
- 911 37. D. Bojkova, M. Widera, S. Ciesek, M. N. Wass, M. Michaelis, J. Cinatl, Reduced interferon  
912 antagonism but similar drug sensitivity in Omicron variant compared to Delta variant of SARS-  
913 CoV-2 isolates. *Cell Res.* 32, 319–321 (2022).
- 914 38. R. M. Effros, F. P. Chinard, The in vivo pH of the extravascular space of the lung. *J Clin*  
915 *Invest.* 48, 1983–1996 (1969).

- 916 39. R. D. de Vries, K. S. Schmitz, F. T. Bovier, C. Predella, J. Khao, D. Noack, B. L. Haagmans,  
917 S. Herfst, K. N. Stearns, J. Drew-Bear, S. Biswas, B. Rockx, G. McGill, N. V. Dorrello, S. H.  
918 Gellman, C. A. Alabi, R. L. de Swart, A. Moscona, M. Porotto, Intranasal fusion inhibitory  
919 lipopeptide prevents direct-contact SARS-CoV-2 transmission in ferrets. *Sci New York N Y.* 371,  
920 1379–1382 (2021).
- 921 40. F. Aguet, S. Upadhyayula, R. Gaudin, Y. Chou, E. Cocucci, K. He, B.-C. Chen, K.  
922 Mosaliganti, M. Pasham, W. Skillern, W. R. Legant, T.-L. Liu, G. Findlay, E. Marino, G. Danuser,  
923 S. Megason, E. Betzig, T. Kirchhausen, Membrane dynamics of dividing cells imaged by lattice  
924 light-sheet microscopy. *Mol Biol Cell.* 27, 3418–3435 (2016).
- 925 41. A. H. Abdelhakim, E. N. Salgado, X. Fu, M. Pasham, D. Nicastro, T. Kirchhausen, S. C.  
926 Harrison, Structural Correlates of Rotavirus Cell Entry. *Plos Pathog.* 10, e1004355 (2014).
- 927 42. E. Cocucci, F. Aguet, S. Boulant, T. Kirchhausen, The First Five Seconds in the Life of a  
928 Clathrin-Coated Pit. *Cell.* 150, 495–507 (2012).
- 929 43. Y.-Y. Chou, S. Upadhyayula, J. Houser, K. He, W. Skillern, G. Scanavachi, S. Dang, A.  
930 Sanyal, K. G. Ohashi, G. D. Caprio, A. J. B. Kreutzberger, T. J. Vadakkan, T. Kirchhausen,  
931 Inherited nuclear pore substructures template post-mitotic pore assembly. *Dev Cell.* 56, 1786-  
932 1803.e9 (2021).
- 933 44. Y. Chen, N. C. Deffenbaugh, C. T. Anderson, W. O. Hancock, Molecular counting by  
934 photobleaching in protein complexes with many subunits: best practices and application to the  
935 cellulose synthesis complex. *Mol Biol Cell.* 25, 3630–3642 (2014).
- 936

937 **ACKNOWLEDGMENTS:**

938 We thank Stephen C Harrison for comments, suggestions, and extensive editorial assistance and  
939 members of our laboratories for help and encouragement; the staff at HUSLAB Virology and  
940 Immunology for providing human nasal swabs for virus isolation, to Suvi Kuivanen and Teemu  
941 Smura for virus propagation, sequencing and discussions, and Sanna Mäki for excellent technical  
942 work; Elliott Somerville (Kirchhausen laboratory) for excellent laboratory management; Tegye John  
943 Vadakkan for maintaining the spinning disc confocal microscope; Lena Tveriakhina (Blacklow  
944 laboratory, Harvard Medical School) for western blot analysis.

945

946 **Funding:**

947 NIH Maximizing Investigators' Research Award (MIRA) GM130386 (TK)

948 NIH Grant AI163019 (SPJW, TK)

949 Danish Technical University (TK)

950 SANA (TK)

951 Harvard Virology Program, NIH training Grant T32 AI07245 postdoctoral fellowship (AJBK)

952 Academy of Finland research grant 318434 (GB, RO)

953 Academy of Finland research grants 335527 and 336490 (OV)

954 Helsinki University Hospital Funds TYH2018322 (OV)

955 University of Helsinki Graduate Program in Microbiology and Biotechnology (RO)

956

957 **Author contributions:**

958 Alex J.B. Kreuzberger carried all the experiments except those with human SARS-CoV-2  
959 isolates. Louis-Marie Bloyet and Spencer Stumpf generated, characterized, and sequenced the  
960 recombinant virus VSV-eGFP-P-SARS-CoV-2 Whuhan. Zhuoming Liu generated, characterized,  
961 and sequenced the recombinant viruses VSV-eGFP-SARS-CoV-2 Delta and Omicron. Anwasha  
962 Sanyal generated SVGA-A ACE2 and SVGA-A ACE2 TMPRSS2, maintained the cells lines and  
963 assisted with infectivity assays. Catherine A. Doyle helped analyzed data and carried out some  
964 VSV-SARS-CoV-2 infection assays. Elliott Somerville helped with virus sample preparation for  
965 DNA sequence. Gustavo Scanavachi and Anand Saminathan helped collect LLSM imaging data.  
966 Giuseppe Di Caprio set up the single particle data analysis pipeline. Volker Kiessling developed  
967 the LabVIEW-based viewer, simulated data and produced the single-particle MSD fitting  
968 algorithm. Sean P. J. Whelan oversaw the work to generate and characterize the VSV-chimeras,  
969 participated in early discussions, and helped edit portions of the manuscript. Giuseppe Balistreri  
970 guided the work on SARS-CoV-2 and performed infection assays, imaging, and image analysis.

971 Ravi Ojha performed SARS-CoV-2 infection assays, imaging, and image analysis. Olli Vapalahti  
972 coordinated the BSL3 work, provided SARS-CoV-2 and performed virus sequencing.  
973 Tom Kirchhausen and Alex J.B. Kreutzberger were responsible for the overall design of the study;  
974 Tom Kirchhausen drafted the manuscript with direct input from Alex J.B. Kreutzberger; all authors  
975 commented on the manuscript.

976

#### 977 **Competing interests**

978 T.K. is a member of the Medical Advisory Board of AI Therapeutics, Inc. The other authors declare  
979 no competing interests.

980

#### 981 **Data and material availability**

982 All materials and data generated in this study are available upon request. Further information and  
983 requests for resources and reagents should be directed to and will be fulfilled by the lead contact,  
984 Dr. Tom Kirchhausen, <mailto:kirchhausen@crystal.harvard.edu>. Requests for VSV-SARS-CoV-2  
985 chimeras and their materials transfer agreements (MTA) should be directed to and will be fulfilled  
986 by Dr. Sean Whelan, [spjwhelan@wustl.edu](mailto:spjwhelan@wustl.edu). This study did not generate any unique large-scale  
987 datasets. The LabView code for visualizing trajectories is available for download (GITHUB).



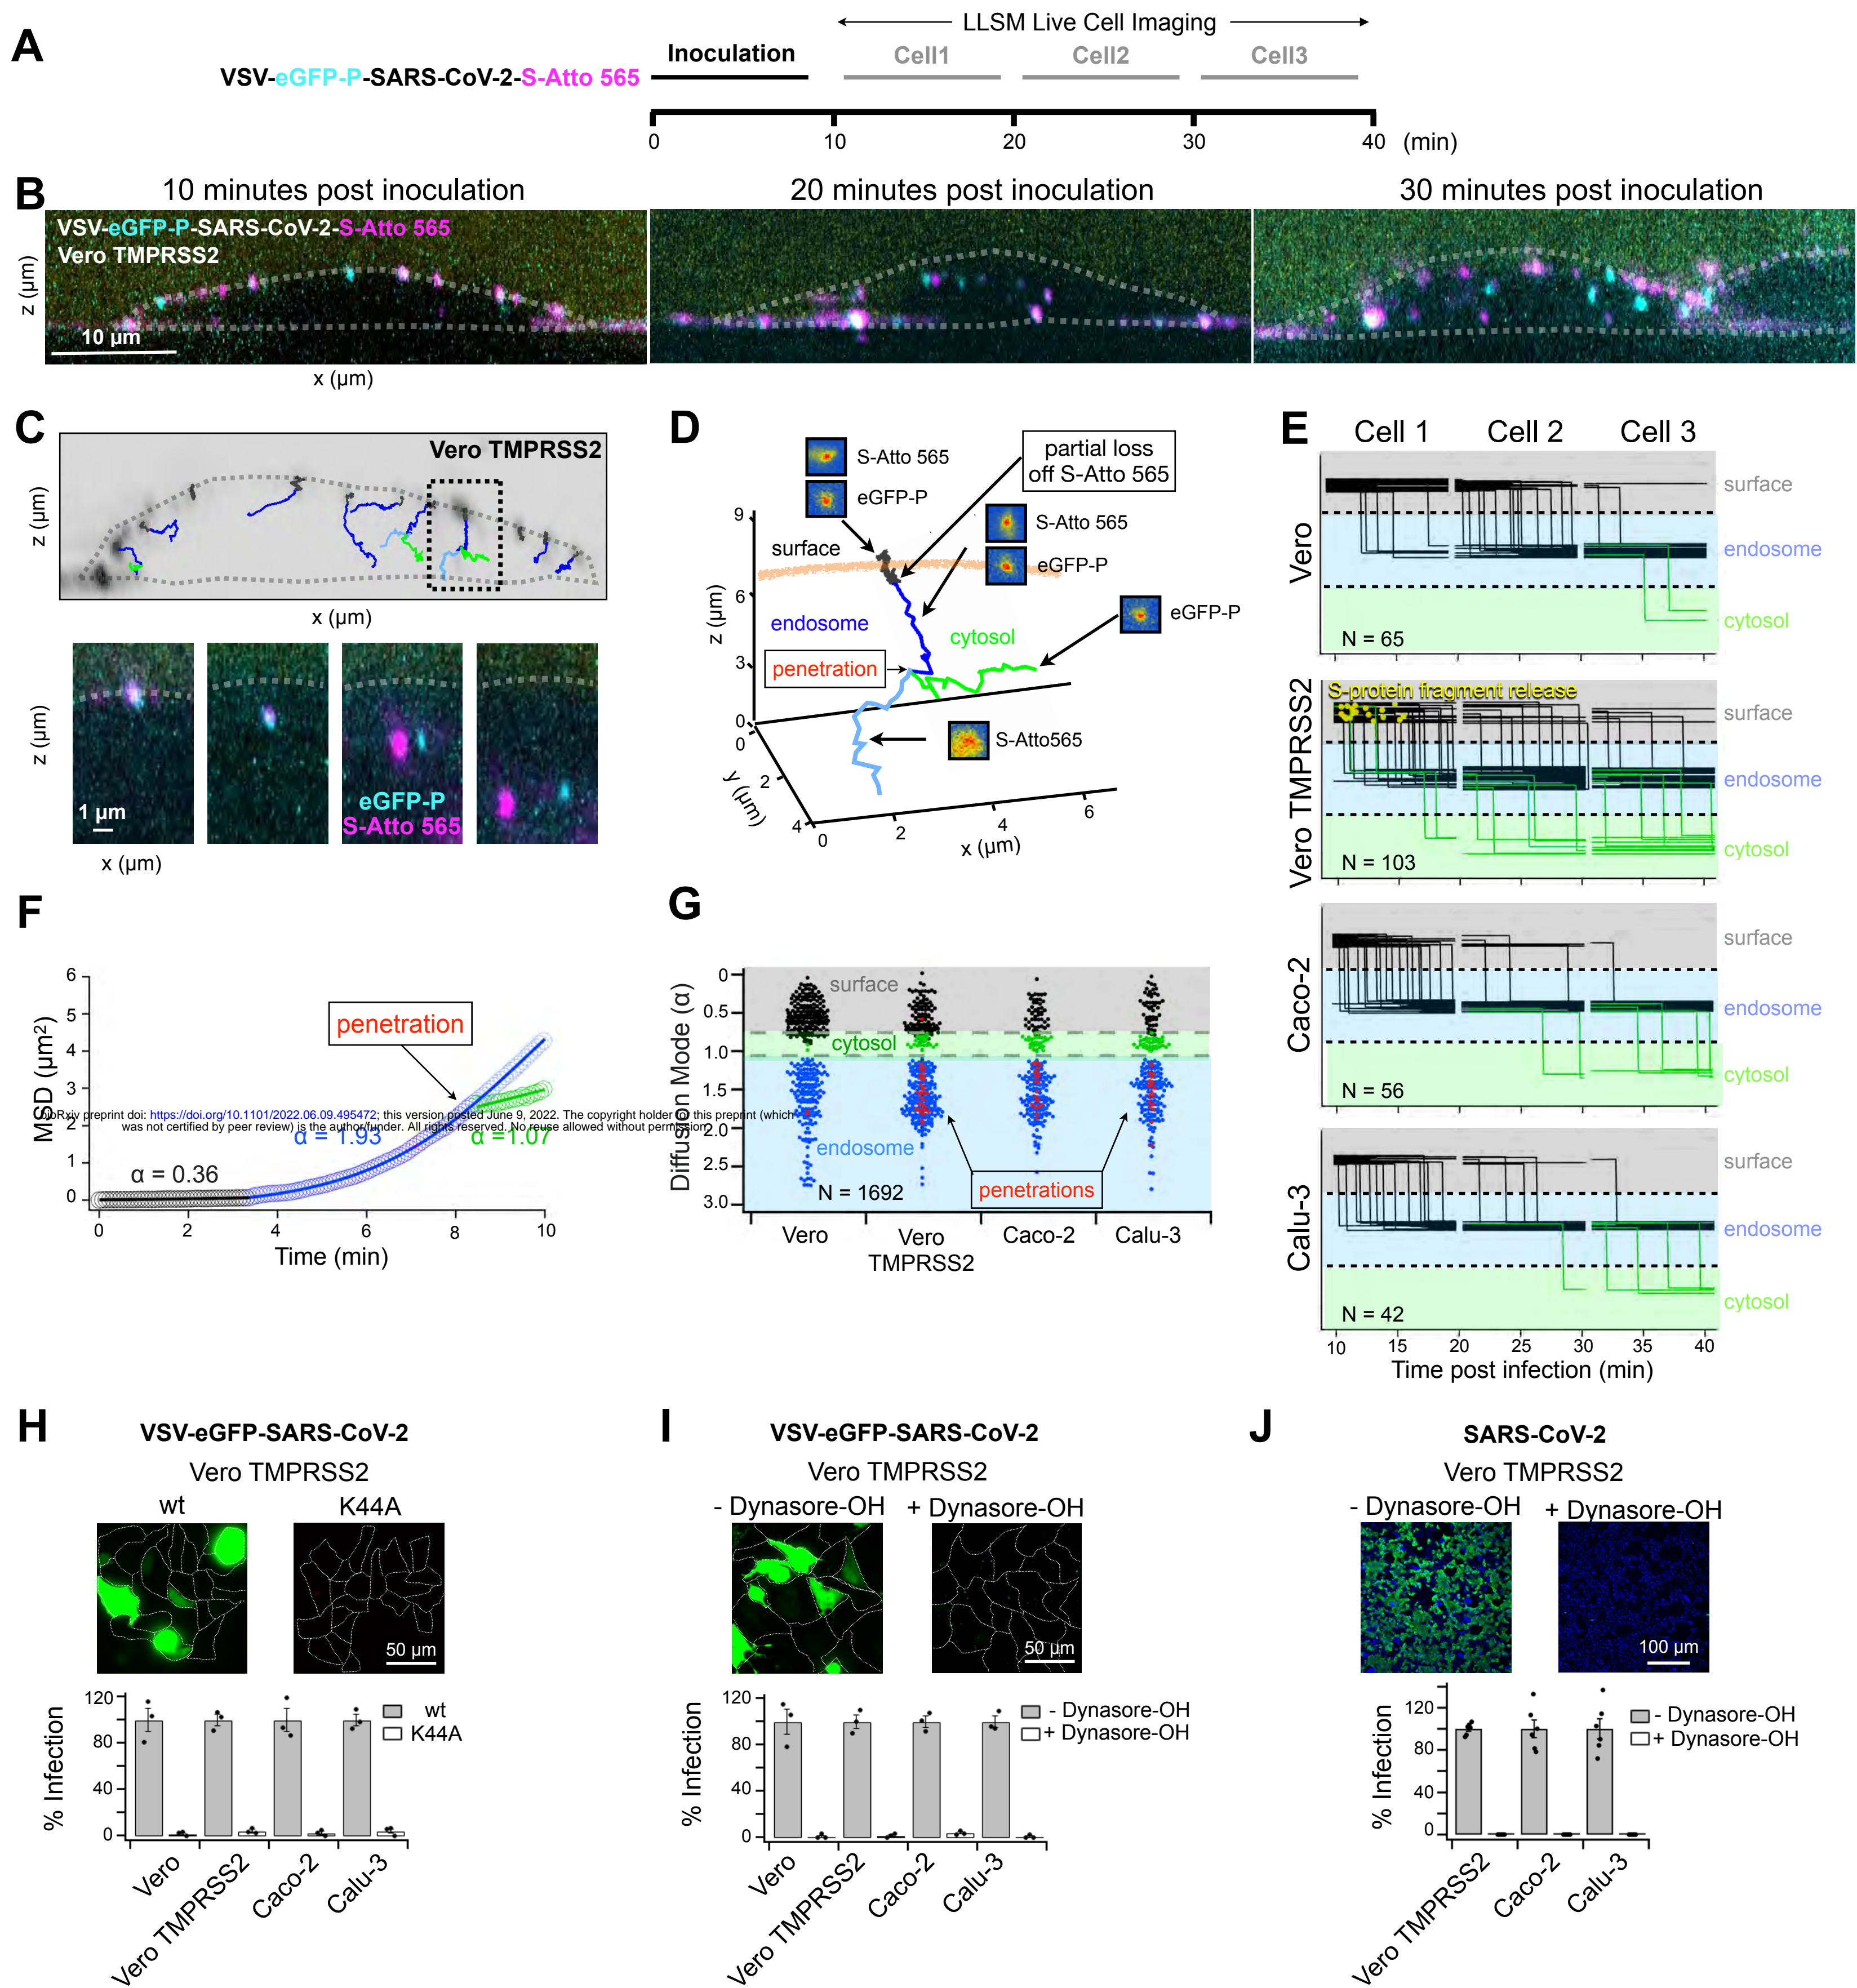

**Figure 1**

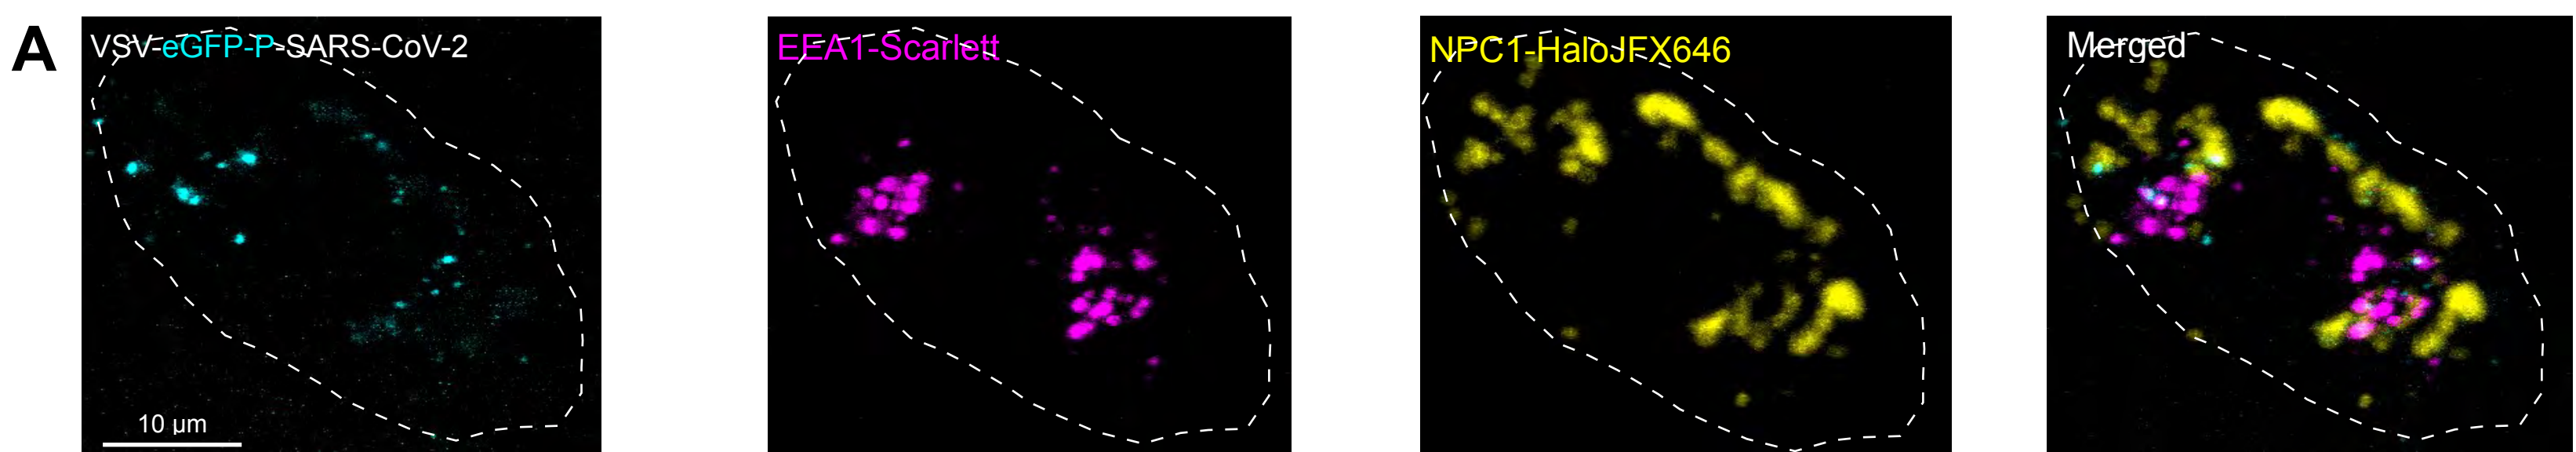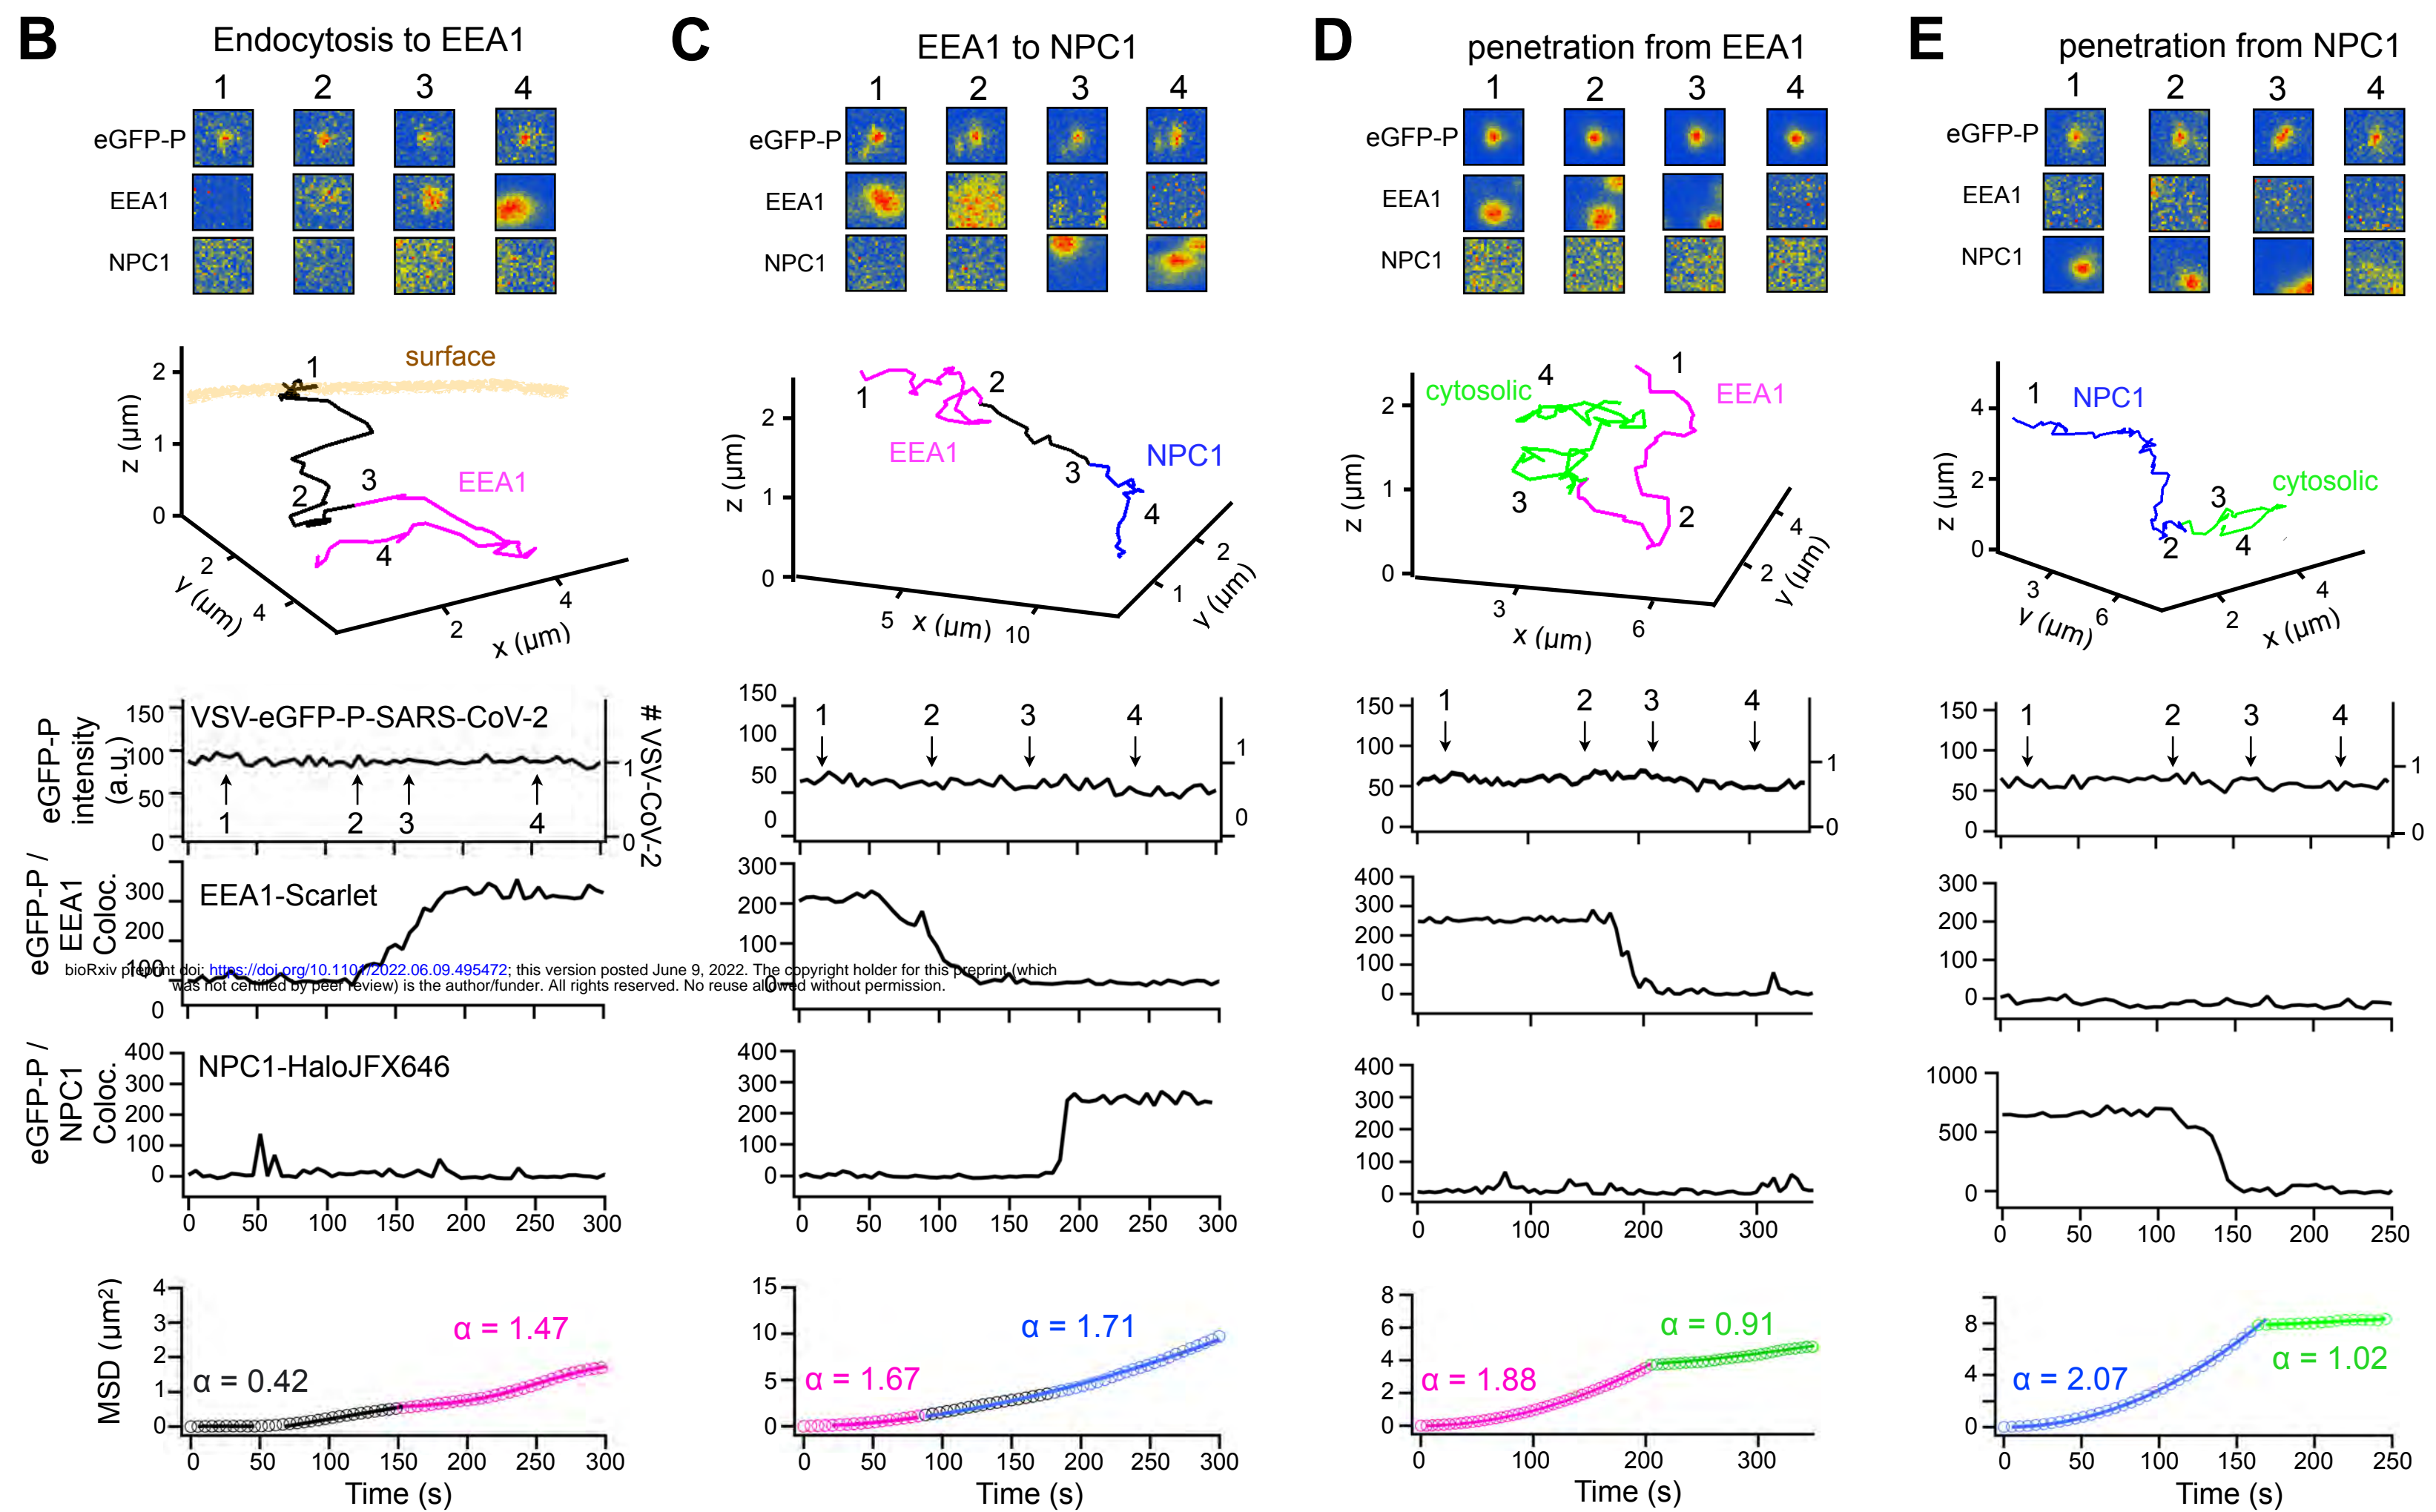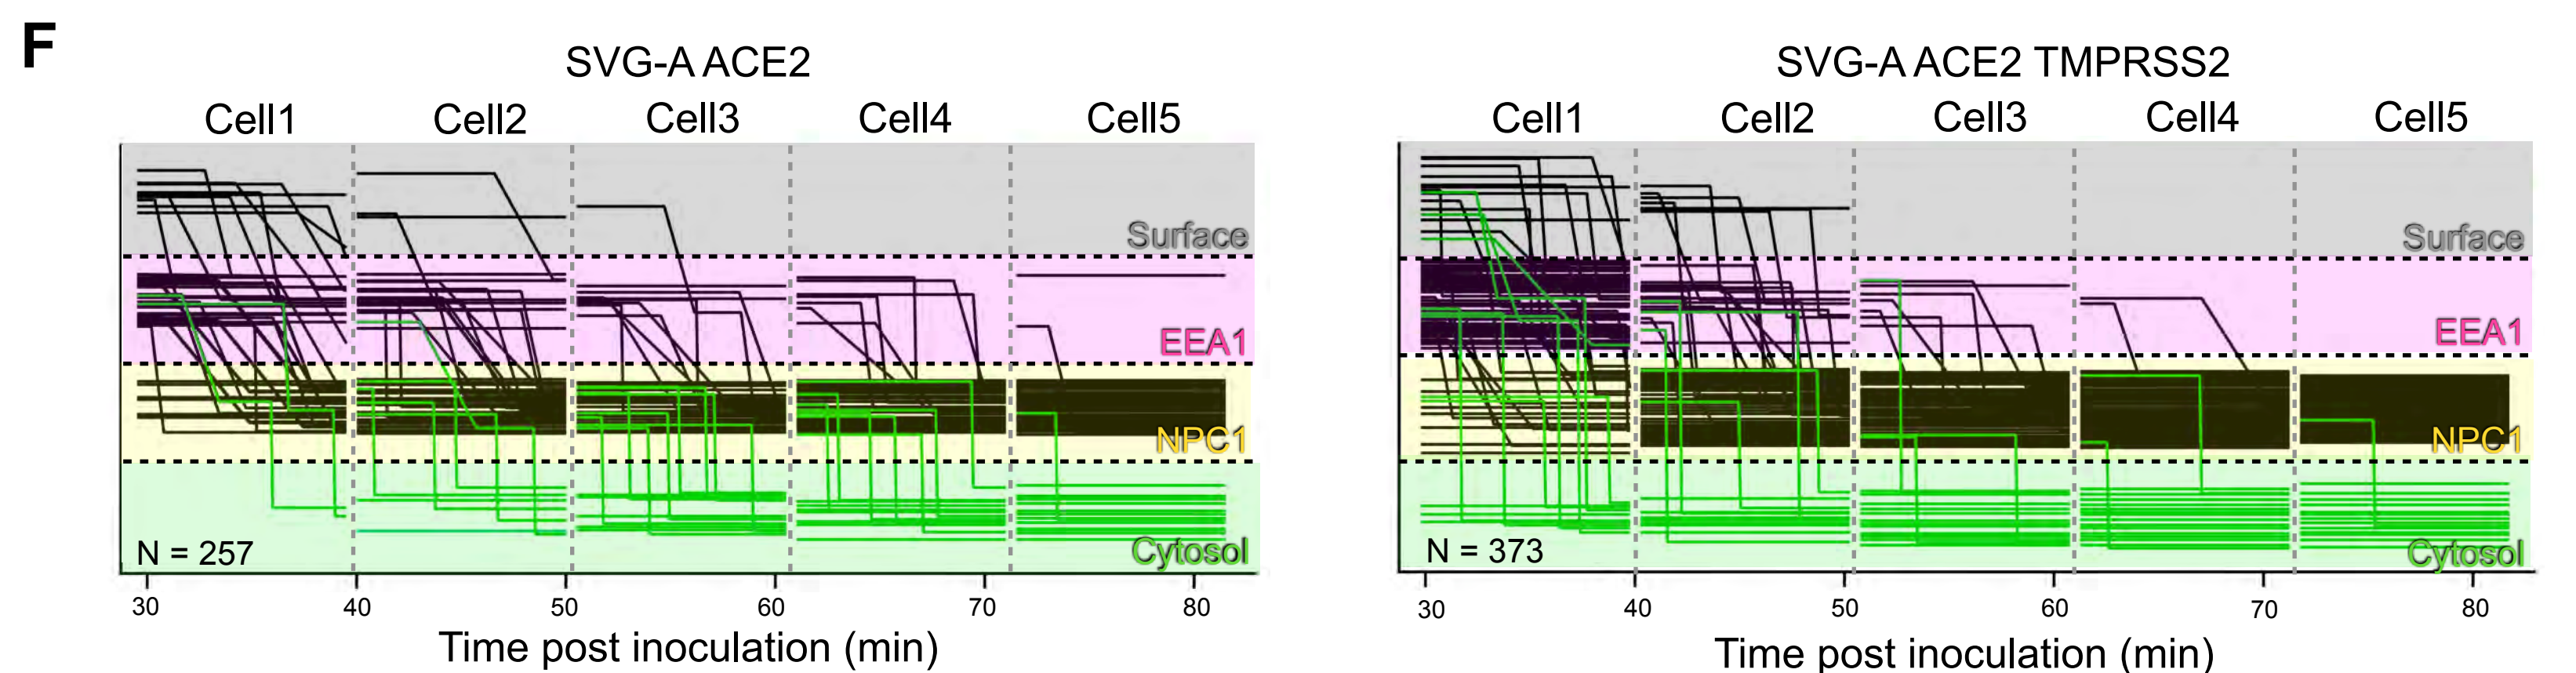

**Figure 2**

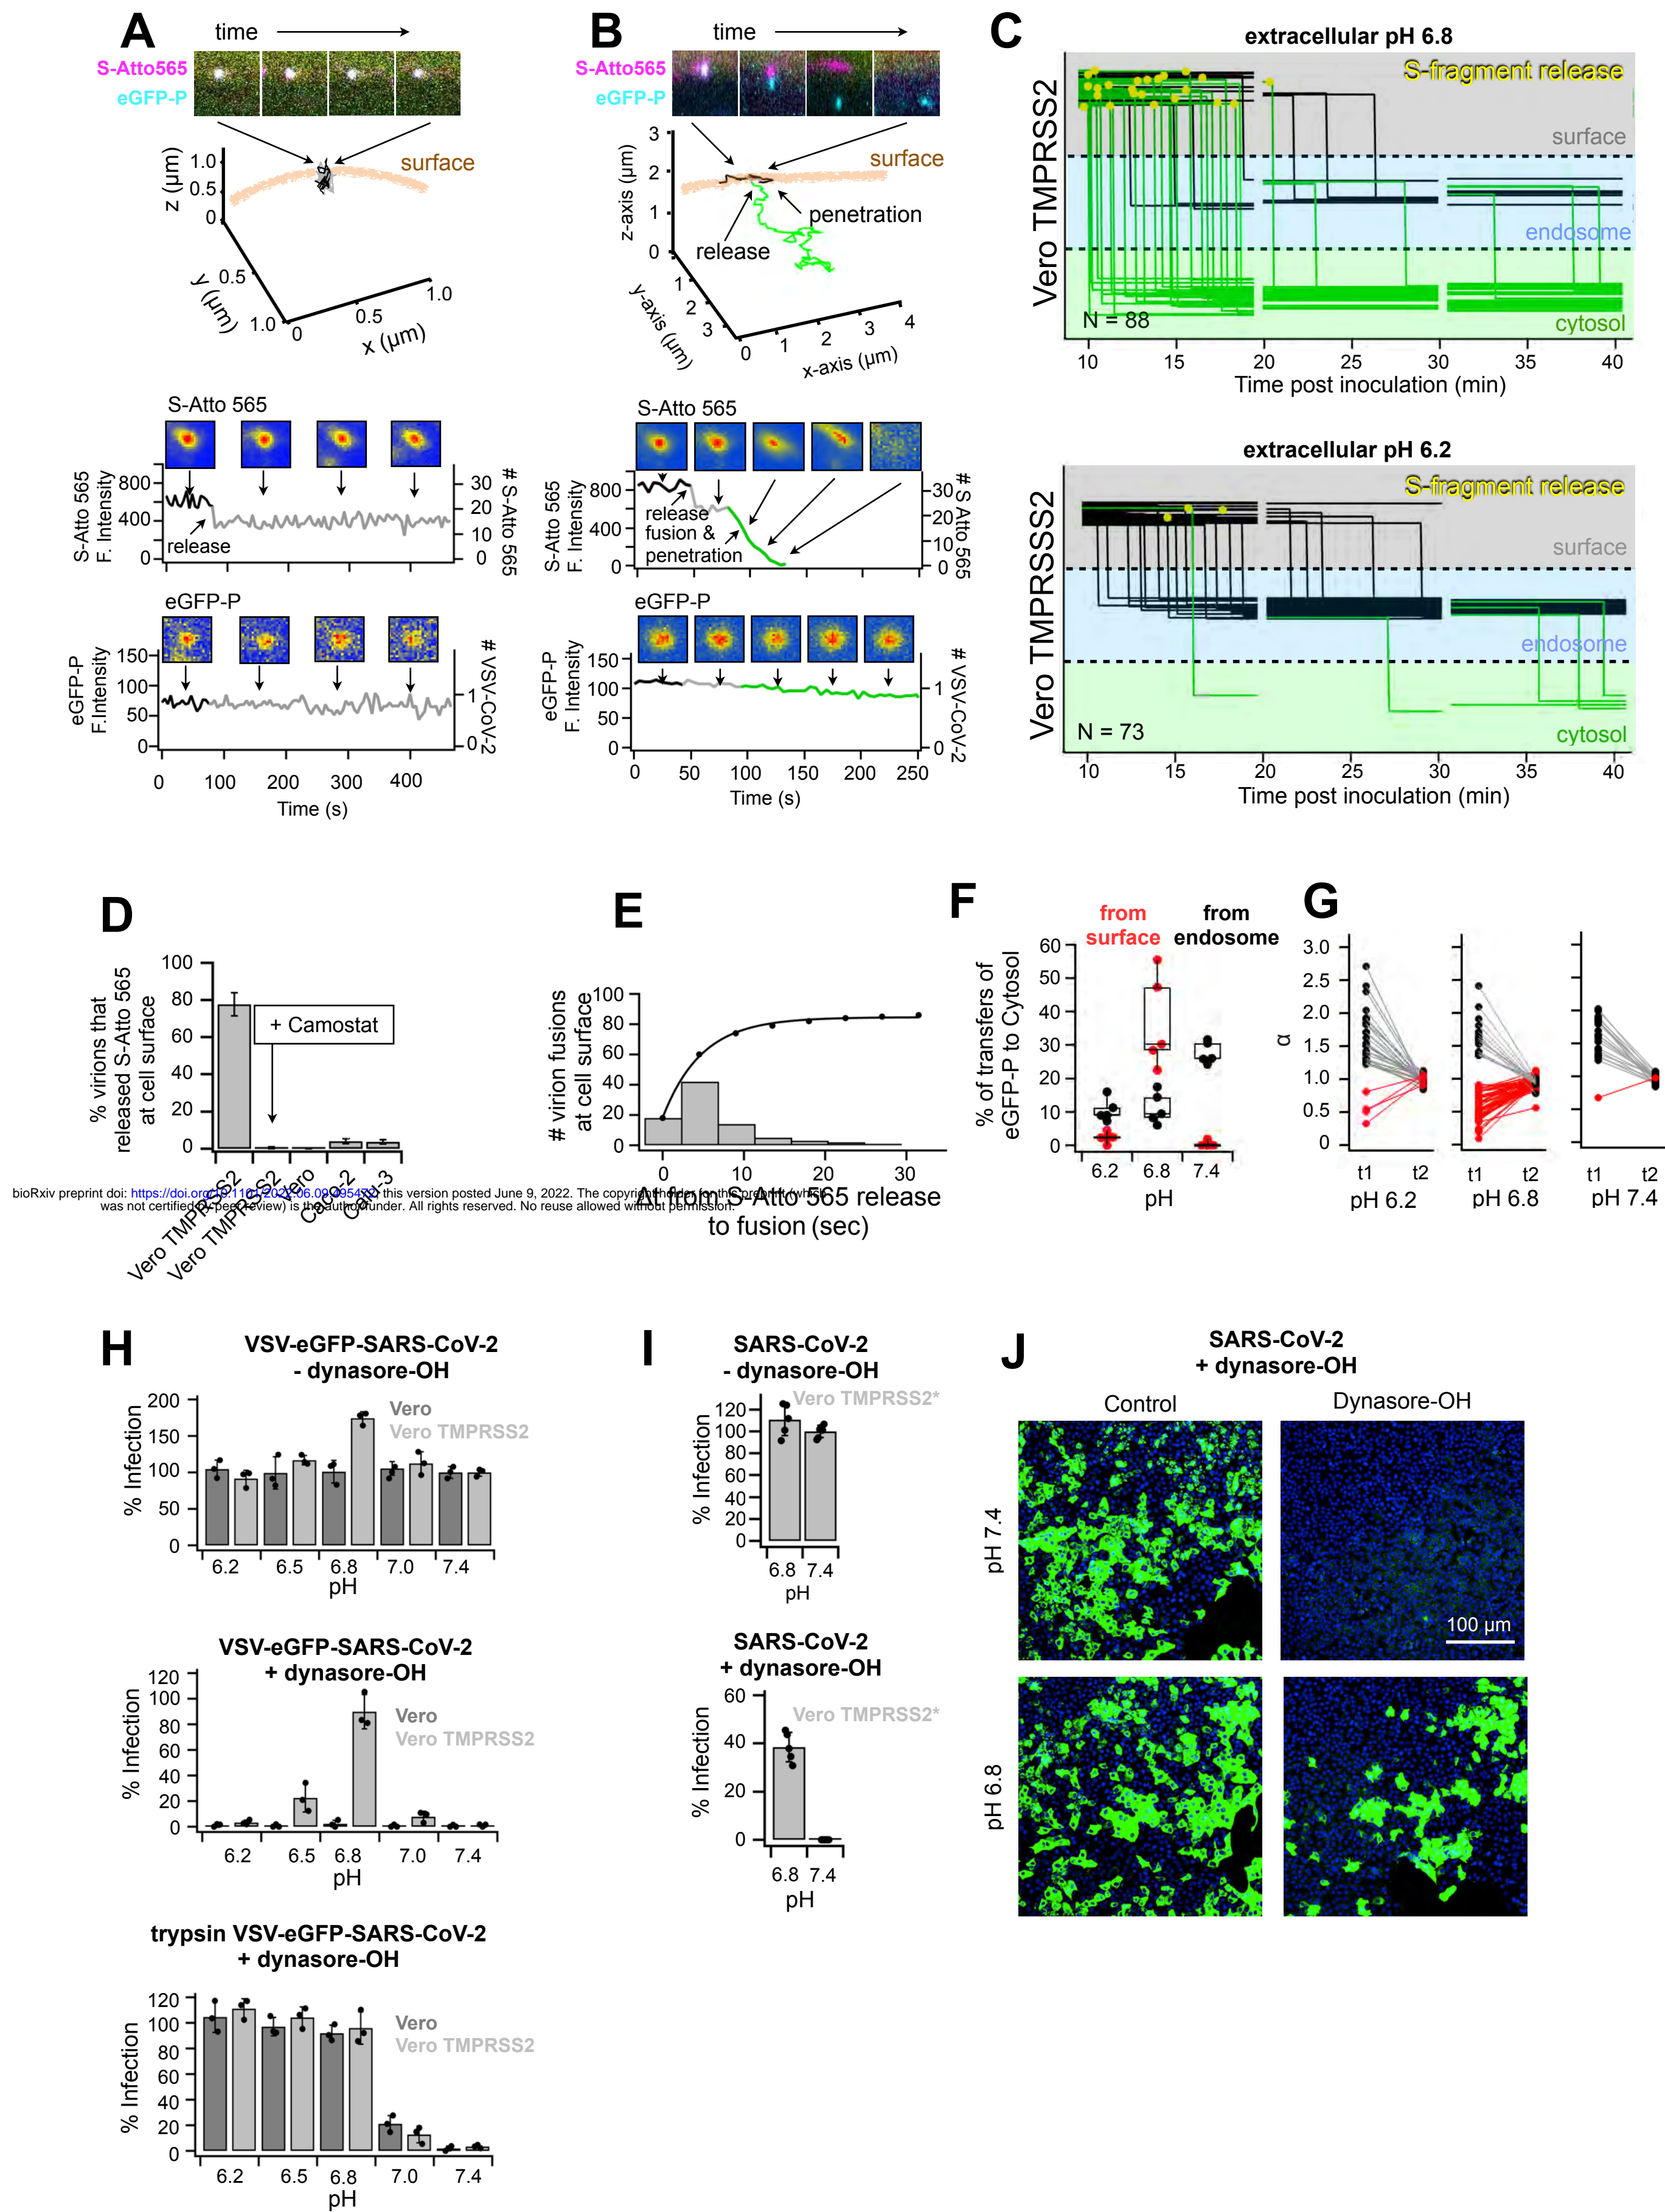

**Figure 3**

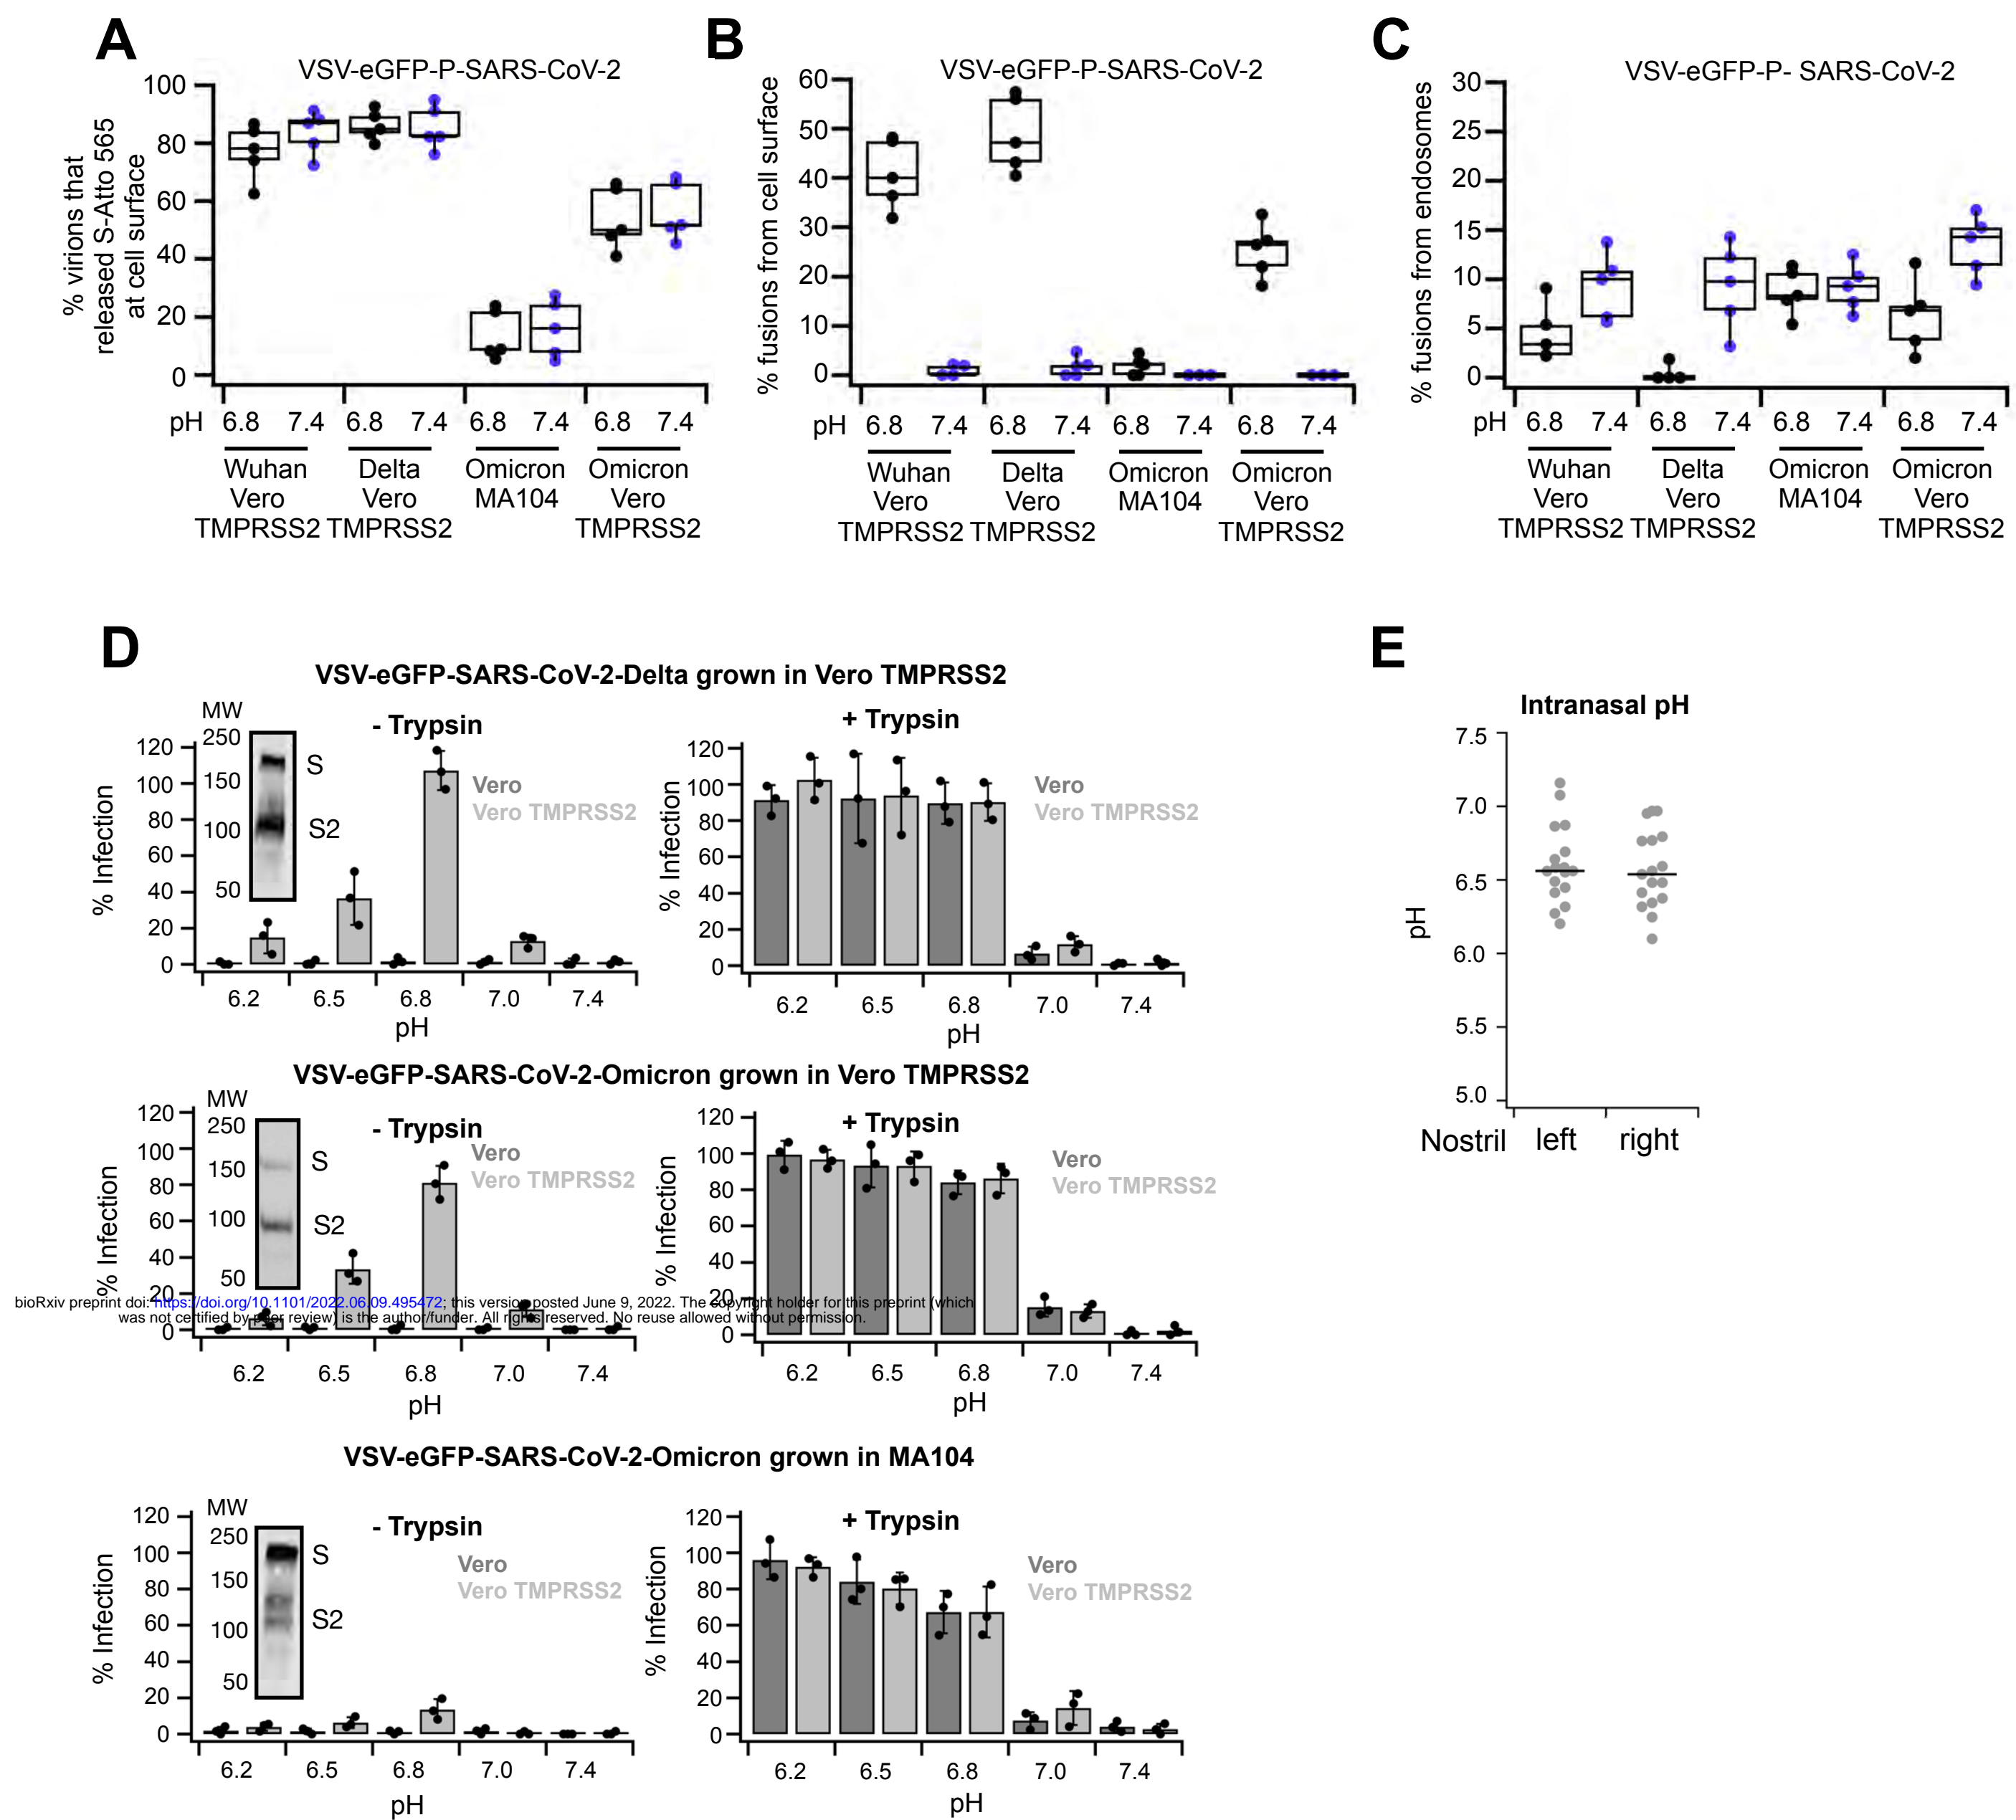

**Figure 4**

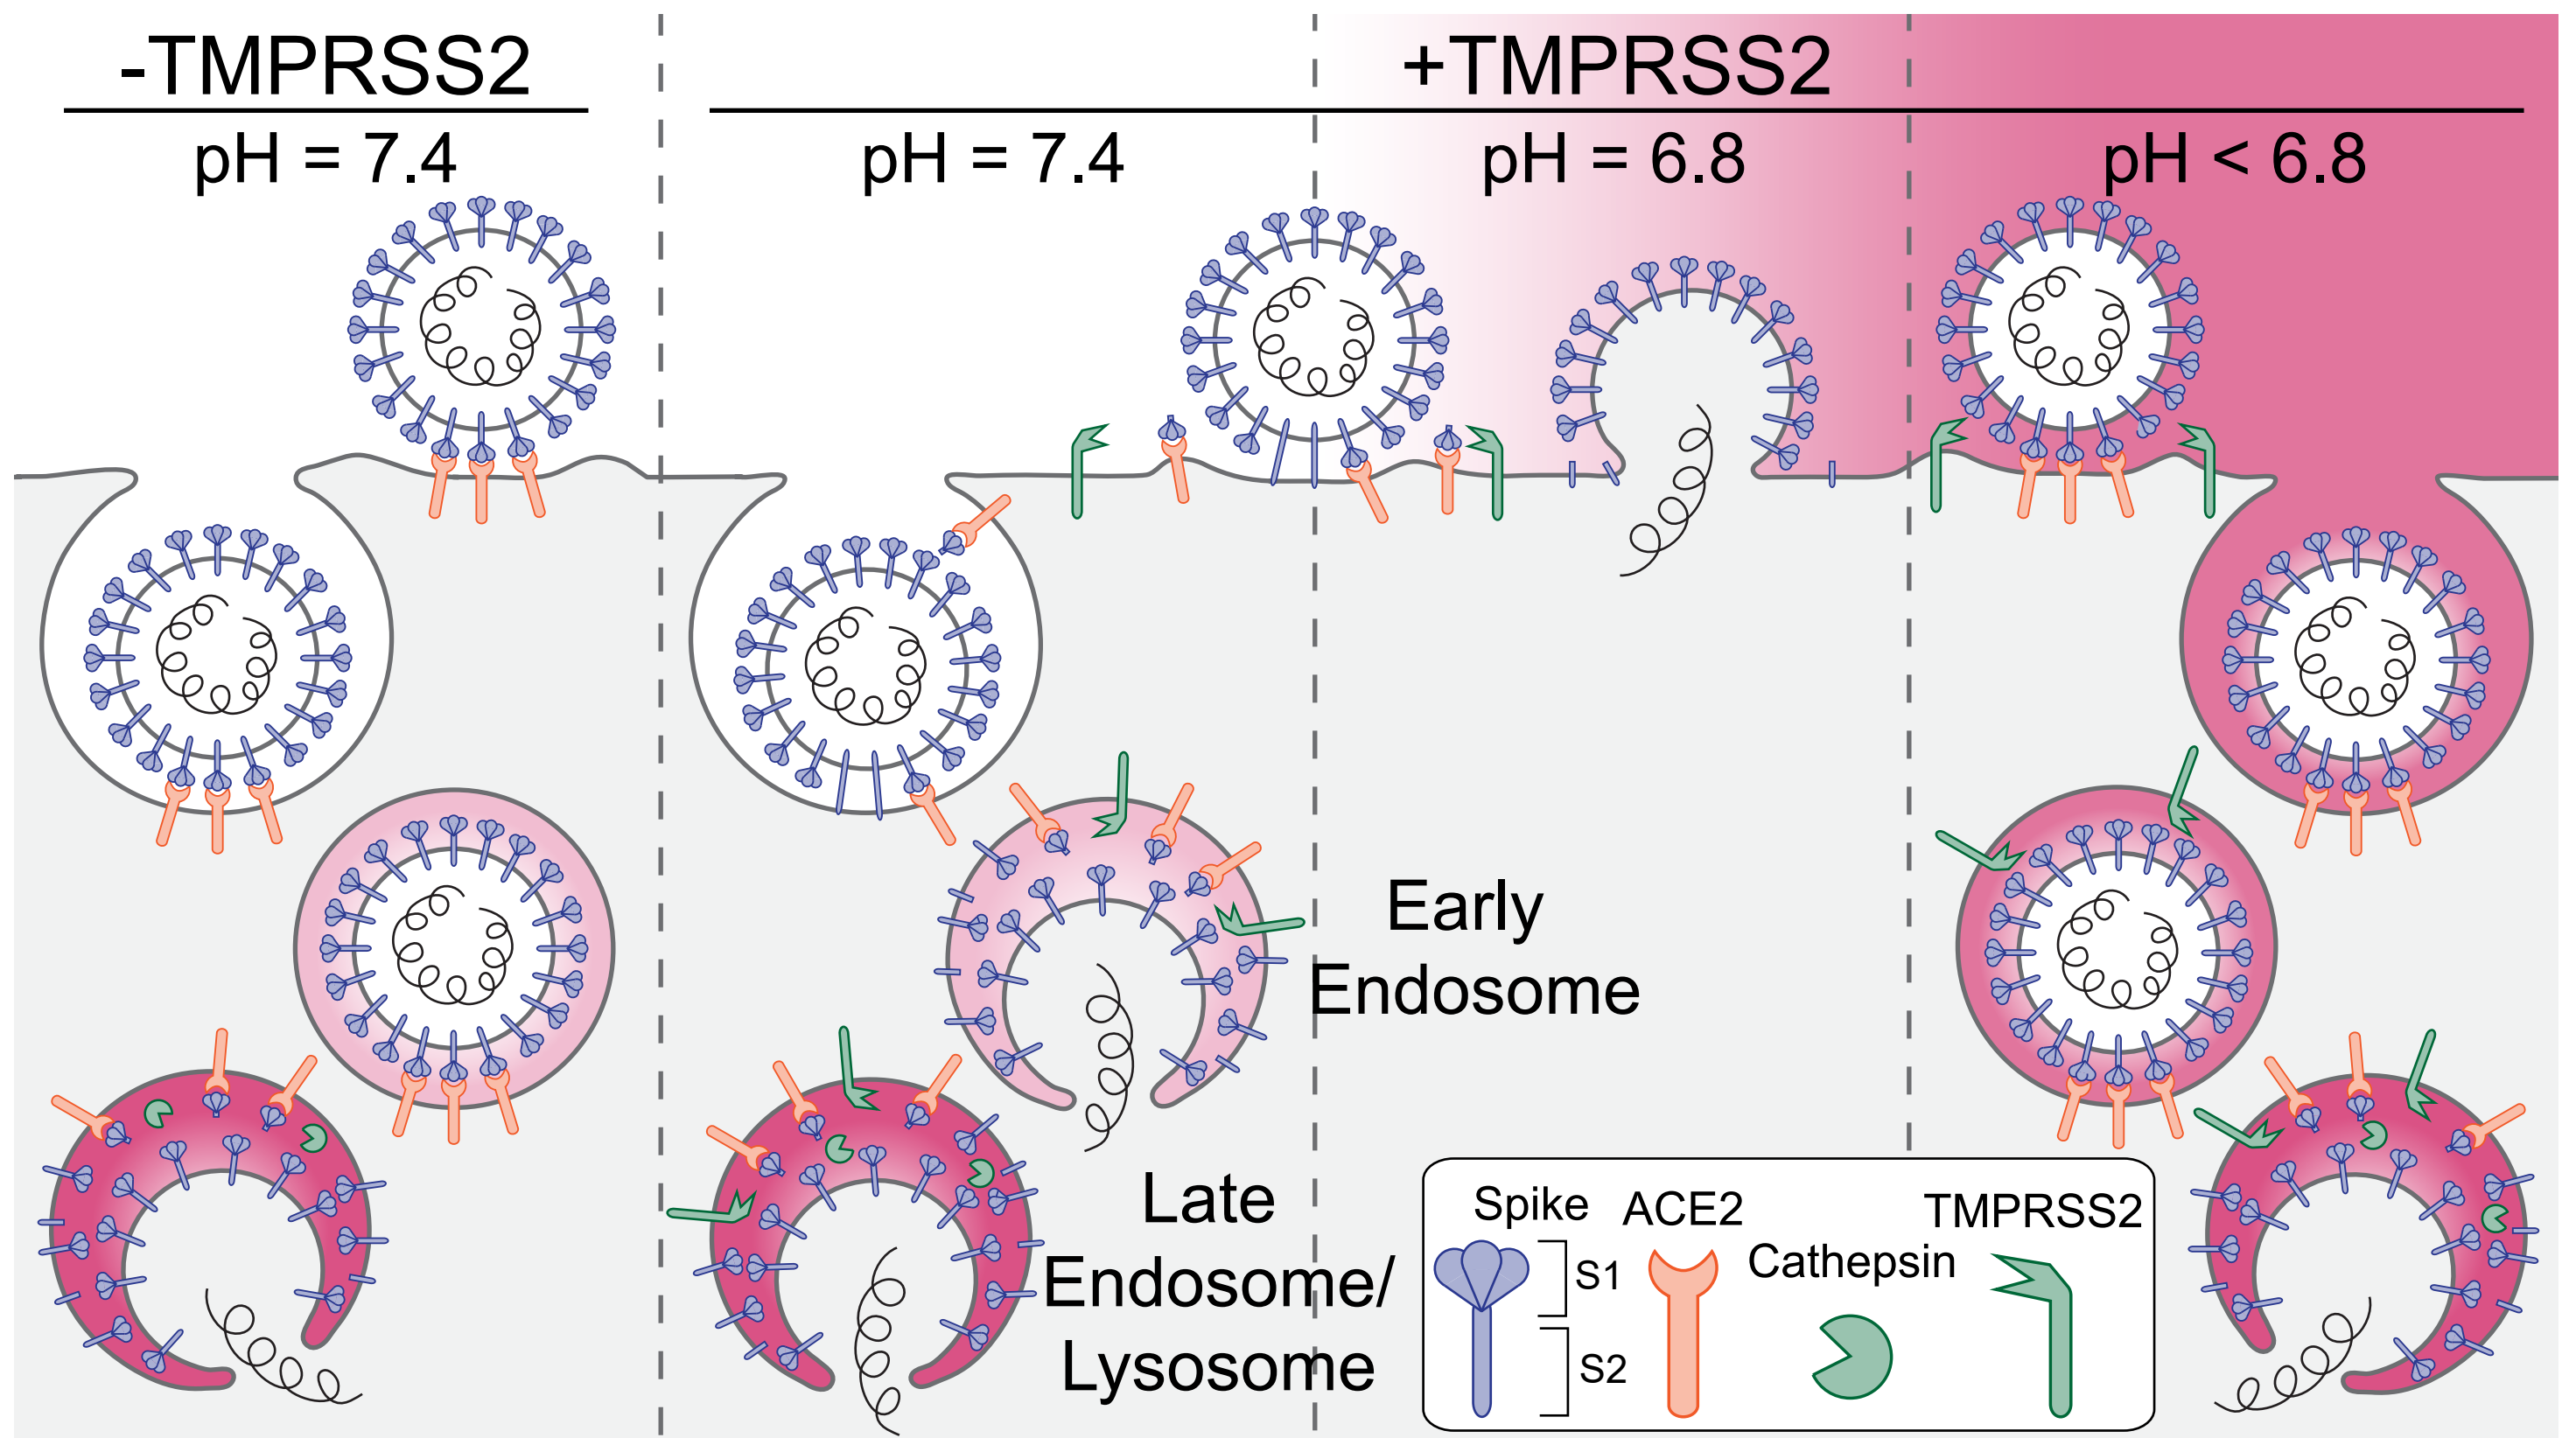

bioRxiv preprint doi: <https://doi.org/10.1101/2022.06.09.495472>; this version posted June 9, 2022. The copyright holder for this preprint (which was not certified by peer review) is the author/funder. All rights reserved. No reuse allowed without permission.

**Figure 5**
